# Supplementary material
Source: PubMed Central journal article supplement (PMC3532527)
Supplement: NIHMS423193-supplement-1_si_001.pdf [file NIHMS423193-supplement-1_si_001.pdf]

Supporting Information for

# Creation of an HDAC-Based Yeast Screening Method for Evaluation of Marine-Derived Actinomycetes: Discovery of Streptosetin A

## Part 1

*Taro Amagata,<sup>†\*</sup> Jing Xiao,<sup>†</sup> Yi-Pei Chen,<sup>†</sup> Nicholas Holsopple,<sup>†</sup> Allen G. Oliver,<sup>‡</sup> Trevor Gokey,<sup>†</sup> Anton B. Guliaev,<sup>†</sup> Katsuhiko Minoura<sup>§</sup>*

<sup>†</sup>Department of Chemistry and Biochemistry, San Francisco State University, San Francisco, CA 94132,

<sup>‡</sup>Department Chemistry and Biochemistry, University of Notre Dame, Notre Dame, 46556, <sup>§</sup>Osaka University of Pharmaceutical Sciences, Takatsuki, Osaka 569-1094, Japan

## Table of Contents

### Part 1

#### [Figures]

**Figure S1.** The strain CP13-10 on an ISP2 plate

**Figure S2.** 16s rRNA sequence of the strain CP13-10

**Figure S3.** Yeast screening result for splitomicin

**Figure S4.** Yeast assay for streptosetin A (**1**) and sirtinol

**Figure S5.** In vitro SIRT1 and SIRT2 assays for streptosetin A (**1**) and sirtinol

#### [Tables]

**Table S1.** Carbon chemical shifts for tetramic acid derivatives

**Table S2.** Crystal data and structure refinement for **1**

**Table S3.** Atomic coordinates and equivalent isotropic displacement parameters ( $\text{\AA}^2$ ) for **1**

**Table S4.** Bond lengths [ $\text{\AA}$ ] and angles [ $^\circ$ ] for **1**

**Table S5.** Anisotropic displacement parameters ( $\text{\AA}^2 \times 10^3$ ) for **1**

**Table S6.** Torsion angles [ $^\circ$ ] for **1**

**Table S7.** Hydrogen coordinates ( $\times 10^4$ ) and isotropic displacement parameters ( $\text{\AA}^2 \times 10^3$ ) for **1**

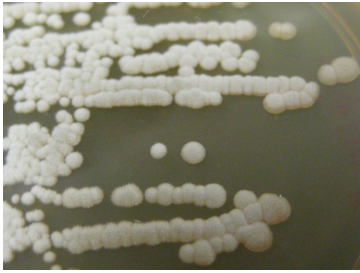

**Figure S1.** The strain CP13-10 on an ISP2 plate

```
3'-GCTCAGGACGAACGCTGGCGGCGTGCTTAACACATGCAAGTCGAACGATGAACCGGTTTC
GGCCGGGGATTAGTGGCGAACGGGTGAGTAACACGTGGGCAATCTGCCCTGCACTCTGGG
ACAAGCCCTGGAAACGGGGTCTAATACCGGATATGACACGCTCCCGCATGGGATGCGTGT
GGAAAGCTCCGGCGGTGCAGGATGAGCCCCGCGCCTATCAGCTTGTTGGTGGGGTGATGG
CCTACCAAGGCGACGACGGGTAGCCGGCCTGAGAGGGCGACCGCCCACTGGGACTGAG
ACACGGCCCAGACTCCTACGGGAGGCAGCAGTGGGGAATATTGCACAATGGGCGAAAGCC
TGATGCAGCGACGCCGCTGAGGGATGACGGCCTTCGGGTTGTAAACCTCTTTCAGCAGG
GAAGAAGCGAGAGTGACGGTACCTGCAGAAGAAGCGCCGGCTAACTACGTGCCAGCAGCC
GCGGTAATACGTAGGGCGCAAGCGTTGTCCGGAATTATTGGGCGTAAAGAGCTCGTAGGC
GGCTTGTCACGTCCGATGTGAAAGCCCGGGGCTTAACTCCGGGTCTGCATTGATACGGG
CAGGCTAGAGTTCCGTAGGGGAGATCGGAATTCCTGGTGTAGCGGTGAAATGCGCAGATA
TCAGGAGGAACACCGGTGGCGAAGGCGGATCTCTGGGCCGATACTGACGCTGAGGAGCGA
AAGCGTGGGGAGCGAACAGGATTAGATACCCTGGTAGTCCACGCCGTAACGTTGGGAAC
TAGGTGTGGGCGACATTCCACGTCGTCCGCGCCGCGAGCTAACGCATTAAGTTCCCCGCCT
GGGGAGTACGGCCGCAAGGCTAAACTCAAAGGAATTGACGGGGGCCCGCACAAAGCGGCG
GAGCATGTGGCTTAATTCGACGCAACGCGAAGAACCTTACCAAGGCTTGACATACACCGG
AAACTCTGGAGACAGGGGCCCCCTTGTGGTCCGGTGTACAGGTGGTGCATGGCTGTGTCGTC
AGCTCGTGTGCGTGAGATGTTGGGTTAAGTCCCGCAACGAGCGCAACCCTTGTCTGTGTT
GCCAGCATGCCTTTCGGGGTGATGGGGACTCACAGGAGACTGCCGGGGTCAACTCGGAGG
AAGGTGGGGACGACGTC AAGTCATCATGCCCTTATGTCTTGGGCTGCACACGTGCTACA
ATGGCCGGTACAATGAGCTGCGAAGCCGTGAGGTGGAGCGAATCTCAAAAAGCCGGTCTC
AGTTCGGATTGGGGTCTGCAACTCGACCCCATGAAGTCGGAGTCGCTAGTAATCGCAGAT
CAGCATTGCTGCGGTGAATACGTTCCCGGGCCTTGTACACACCGCCCGTCACGTCACGAA
AGTCGGTAACACCCGAAGCCGGTGGCCCAACCCTTGTGGGGGGAGCCGTCGAAGGTGGGA
CTGGCGATTGGGACGAAGTCGTAACA-5'
```

**Figure S2.** 16s rRNA sequence of the strain CP13-10 (GenBank accession number: JX235443)

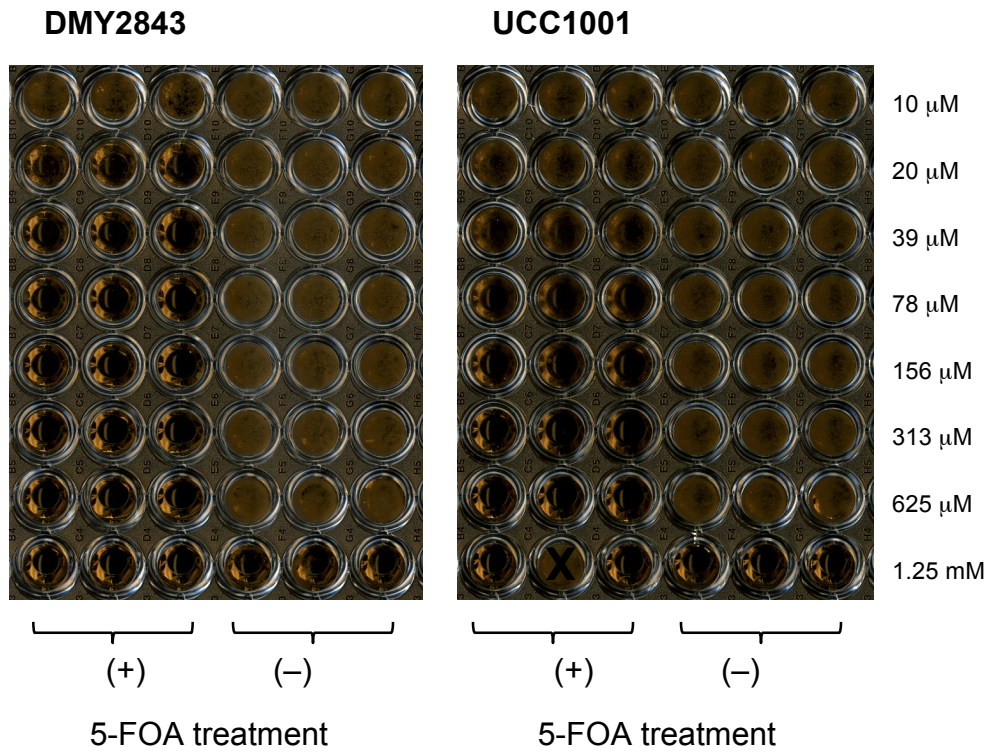

**Figure S3.** Yeast screening result for splitomicin.

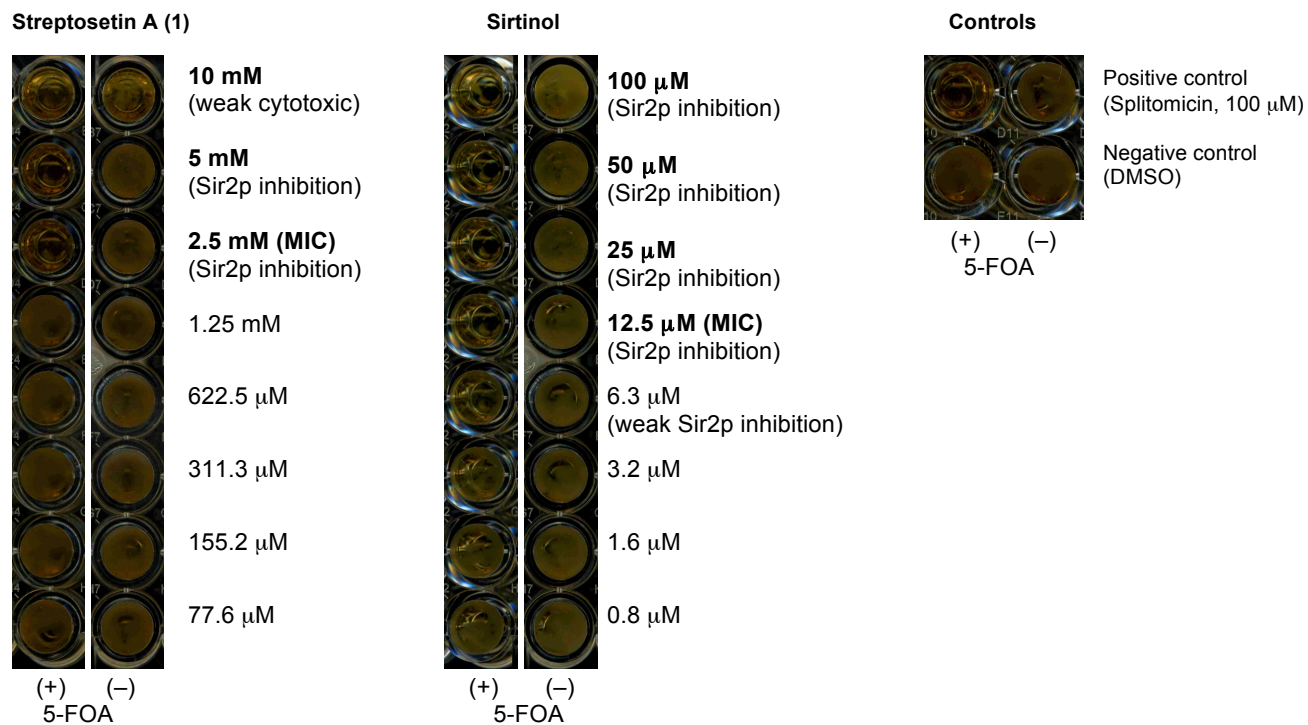

**Figure S4.** Yeast assay for streptoesetin A (1) and sirtinol

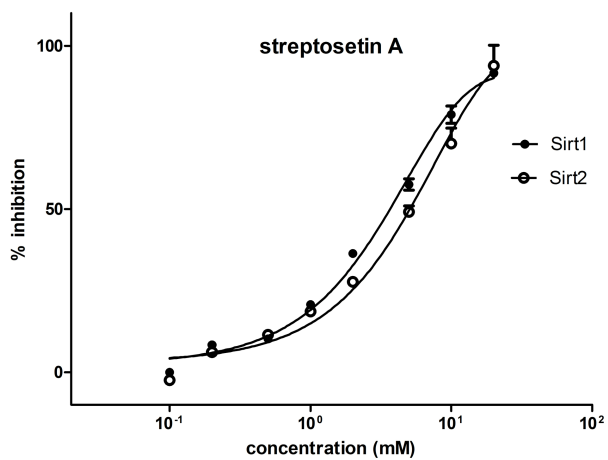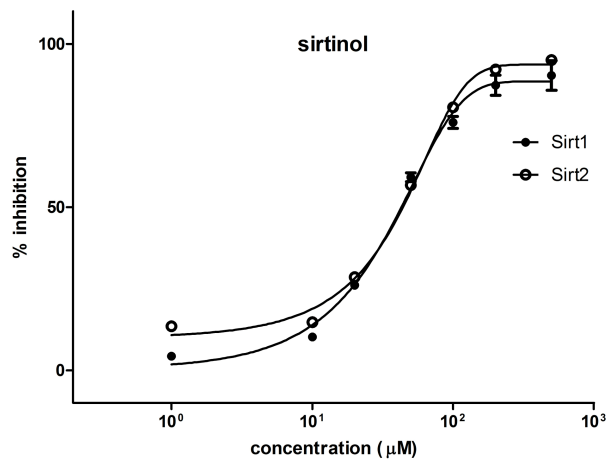

**Figure S5.** In vitro SIRT1 and SIRT2 assays for streptoesetin A (1) and sirtinol

**Table S1.** Carbon chemical shifts for selected tetramic acid derivatives

Type I tautomer

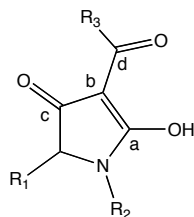

| Compound Name                | Carbon chemical shift |       |       |       | Solvent            | Substituent                                       |                 |                 | X-Ray | Biological source                    | Ref |
|------------------------------|-----------------------|-------|-------|-------|--------------------|---------------------------------------------------|-----------------|-----------------|-------|--------------------------------------|-----|
|                              | a                     | b     | c     | d     |                    | R <sub>1</sub>                                    | R <sub>2</sub>  | R <sub>3</sub>  |       |                                      |     |
| Discodermide                 | 193.5                 | 101.1 | 178.5 | 183.9 | CD <sub>3</sub> OD | CH(OH)alkyl                                       | H               | alkyl           | N     | <i>Discodermia dissoluta</i>         | 1   |
| Epicoccamide A               | 175.3                 | 101.6 | 197.6 | 201.3 | CD <sub>3</sub> OD | CH <sub>3</sub>                                   | CH <sub>3</sub> | alkyl           | N     | <i>Epicoccum purpurascens</i>        | 2   |
| Epicoccamide B               | 173.1                 | 99.8  | 192.0 | 194.6 | CDCl <sub>3</sub>  | CH <sub>3</sub>                                   | CH <sub>3</sub> | alkyl           | N     | <i>Pholiota squarrosa</i>            | 3   |
| Epicoccamide C               | 173.1                 | 99.8  | 192.0 | 194.5 | CDCl <sub>3</sub>  | CH <sub>3</sub>                                   | CH <sub>3</sub> | alkyl           | N     |                                      |     |
| Epicoccamide D               | 173.1                 | 99.8  | 191.9 | 194.5 | CDCl <sub>3</sub>  | CH <sub>3</sub>                                   | CH <sub>3</sub> | alkyl           | N     |                                      |     |
| Reutericyclin (Major isomer) | 167.3                 | 106.1 | 199.2 | 195.6 | CD <sub>3</sub> CN | CH <sub>2</sub> CH(CH <sub>3</sub> ) <sub>2</sub> | C(=O)alkyl      | CH <sub>3</sub> | N     | <i>Lactobacillus reuteri</i> LTH2584 | 4   |

Type II tautomer

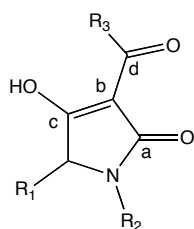

| Compound Name                | Carbon chemical shift |       |       |       | Solvent                                     | Substituent                                       |                 |                 | X-Ray | Biological source                      | Ref |
|------------------------------|-----------------------|-------|-------|-------|---------------------------------------------|---------------------------------------------------|-----------------|-----------------|-------|----------------------------------------|-----|
|                              | a                     | b     | c     | d     |                                             | R <sub>1</sub>                                    | R <sub>2</sub>  | R <sub>3</sub>  |       |                                        |     |
| Altermide A                  | 180.1                 | 103.1 | 184.8 | 194.9 | CD <sub>3</sub> OD                          | CH <sub>3</sub>                                   | CH <sub>3</sub> | alkyl           | N     | <i>Alteromonas</i> sp.                 | 5   |
| Altersetin                   | 179.8                 | 99.7  | 191.5 | 198.6 | DMSO- <i>d</i> <sub>6</sub>                 | CH(OH)CH <sub>3</sub>                             | H               | decalin         | N     | <i>Alternaria</i> spp.                 | 6   |
| BU-4514N                     | 179.1                 | 104.2 | 193.2 | 204.1 | CD <sub>3</sub> OD/D <sub>2</sub> O /4N DCI | None                                              | H               | decalin         | N     | <i>Microtetraspora</i> sp.             | 7   |
| CJ-17572                     | 177.0                 | 100.6 | 192.3 | 200.3 | CDCl <sub>3</sub>                           | CH(OH)CH <sub>3</sub>                             | CH <sub>3</sub> | decalin         | N     | <i>Pezizula</i> sp.                    | 8   |
| Delaminomycin A              | 181.5                 | 101.3 | 192.9 | 204.8 | CD <sub>3</sub> OD                          | OH                                                | H               | decalin         | N     | <i>Streptomyces albulus</i> MJ202-72F3 | 9   |
| Erythroskyrin                | 173.7                 | 100.8 | 194.3 | 172.0 | CDCl <sub>3</sub>                           | CH(CH <sub>3</sub> ) <sub>2</sub>                 | CH <sub>3</sub> | alkyl           | N     | <i>Penicillium islandicum</i>          | 10  |
| Fuligorubin A                | 174.1                 | 100.9 | 174.1 | 194.5 | Acetone- <i>d</i> <sub>6</sub>              | C <sub>2</sub> H <sub>4</sub> COOH                | CH <sub>3</sub> | alkyl           | N     | <i>Fuligo septica</i>                  | 11  |
| Integramycin                 | 177.1                 | 103.3 | 196.3 | 192.3 | Pyridine- <i>d</i> <sub>5</sub>             | OH                                                | H               | decalin         | N     | <i>Actinoplanes</i> sp.                | 12  |
|                              | 176.4                 | 102.6 | 194.3 | 192.2 | Acetone- <i>d</i> <sub>6</sub>              |                                                   |                 |                 |       |                                        |     |
| Lydicamycin                  | 181.0                 | 103.0 | 192.3 | 204.0 | CD <sub>3</sub> OD                          | None                                              | H               | decalin         | N     | <i>Streptomyces lydicus</i>            | 13  |
| Oxasetin                     | 166.5                 | 106.3 | 164.2 | 200.2 | DMSO- <i>d</i> <sub>6</sub>                 | =O                                                | H               | decalin         | N     | <i>Vaginatispora aquatic</i> HK1821    | 14  |
| Pachydermin                  | 165.7                 | 99.4  | 177.0 | 179.3 | DMSO- <i>d</i> <sub>6</sub>                 | =CHPh(OH)Cl                                       | H               | COOH            | N     | <i>Chamonixia pachydermis</i>          | 15  |
| Reutericyclin (Minor isomer) | 174.8                 | 103.6 | 194.5 | 189.3 | CD <sub>3</sub> CN                          | CH <sub>2</sub> CH(CH <sub>3</sub> ) <sub>2</sub> | C(=O)alkyl      | CH <sub>3</sub> | N     | <i>Lactobacillus reuteri</i> LTH2584   | 4   |
| Vergineone                   | 177.1                 | 99.6  | 193.6 | 197.5 | DMSO- <i>d</i> <sub>6</sub>                 | CH <sub>2</sub> PhOH                              | H               | alkyl           | N     | <i>Lachnum virgineum</i>               | 16  |

Type III tautomer

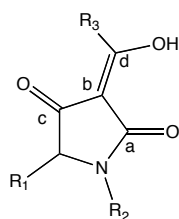

| Compound Name                   | Carbon chemical shift |       |       |        | Solvent                                  | Substituent                                       |                 |                 | X-Ray | Biological source                                        | Ref |
|---------------------------------|-----------------------|-------|-------|--------|------------------------------------------|---------------------------------------------------|-----------------|-----------------|-------|----------------------------------------------------------|-----|
|                                 | a                     | b     | c     | d      |                                          | R <sub>1</sub>                                    | R <sub>2</sub>  | R <sub>3</sub>  |       |                                                          |     |
| Aflastatin A                    | 173.4                 | 98.1  | 192.6 | 191.5  | DMSO- <i>d</i> <sub>6</sub>              | CH <sub>3</sub>                                   | CH <sub>3</sub> | alkyl           | N     | <i>Aspergillus parasiticus</i>                           | 17  |
| Aflastatin B                    | ND                    | ND    | 196.1 | 195.7  | DMSO- <i>d</i> <sub>6</sub>              | CH <sub>3</sub>                                   | H               | alkyl           | N     |                                                          |     |
| Ancorinoside A                  | 174.3                 | 101.8 | 194.1 | 191.4  | Pyridine- <i>d</i> <sub>5</sub>          | CH <sub>2</sub> COOH                              | CH <sub>3</sub> | alkyl           | N     | <i>Ancorina</i> sp.                                      | 18  |
| Aurantioside A                  | 174.8                 | 102.0 | 195.0 | 176.1  | CD <sub>3</sub> OD                       | CH <sub>2</sub> CONH <sub>2</sub>                 | Sugars          | alkyl           | N     | <i>Theonella</i> sp.                                     | 19  |
| Aurantioside B                  | 174.9                 | 102.0 | 195.1 | 176.2  | CD <sub>3</sub> OD                       | CH <sub>2</sub> CONH <sub>2</sub>                 | Sugars          | alkyl           | N     |                                                          |     |
| Aurantioside D                  | 176.2                 | 102.0 | 194.9 | 174.8  | CD <sub>3</sub> OD                       | CH <sub>2</sub> CONH <sub>2</sub>                 | Sugars          | alkyl           | N     | <i>Siliquariaspongia japonica</i>                        | 20  |
| Blasticidin A                   | 174.4                 | 99.7  | 189.4 | 191.2  | DMSO- <i>d</i> <sub>6</sub>              | None                                              | CH <sub>3</sub> | alkyl           | N     | <i>Aspergillus parasiticus</i>                           | 21  |
| Cissetin                        | 177.6                 | 98.1  | 191.4 | 201.8  | CDCl <sub>3</sub>                        | CH(OH)CH <sub>3</sub>                             | CH <sub>3</sub> | decalin         | N     | An unidentified fungus                                   | 22  |
| CJ-21058                        | 178.1                 | 101.6 | 191.4 | 197.7  | CD <sub>3</sub> CN                       | CH(OH)CH <sub>3</sub>                             | CH <sub>3</sub> | decalin         | N     | An unidentified fungus                                   | 23  |
| Coniosetin                      | 179.5                 | 99.5  | 191.1 | 198.2  | DMSO- <i>d</i> <sub>6</sub>              | CH(OH)CH <sub>3</sub>                             | CH <sub>3</sub> | decalin         | N     | <i>Coniochaeta ellipsoidea</i>                           | 24  |
|                                 | 181.5                 | 101.5 | 193.5 | 201.3  | CD <sub>3</sub> OD                       |                                                   |                 |                 |       |                                                          |     |
| Epicoccarine A                  | 175.3                 | 100.4 | 193.7 | 193.9  | CDCl <sub>3</sub>                        | CH <sub>2</sub> PhOH                              | H               | alkyl           | N     | <i>Pholiota squarrosa</i>                                | 25  |
| Equisetin                       | 176.7                 | 99.8  | 198.9 | 190.6  | CD <sub>3</sub> CN                       | CH <sub>2</sub> OH                                | CH <sub>3</sub> | decalin         | N     | <i>Fusarium equiseti</i><br><i>Fusarium heterosporum</i> | 26  |
|                                 |                       |       |       |        |                                          |                                                   |                 |                 |       |                                                          |     |
| Harzianic acid                  | 173.9                 | 100.9 | 198.9 | 175.9  | CD <sub>3</sub> OD                       | alkyl                                             | CH <sub>3</sub> | alkyl           | N     | <i>Trichoderma harzianum</i>                             | 27  |
| Macrocidin                      | 176.8                 | 103.5 | 197.5 | 193.1  | CD <sub>3</sub> OD                       | alkyl                                             | H               | alkyl           | Y     | <i>Phoma macrostoma</i>                                  | 28  |
| Militarinone                    | 175.4                 | 100.4 | 192.8 | 172.2  | DMSO- <i>d</i> <sub>6</sub>              | CH(OH)PhOH                                        | H               | alkyl           | N     | <i>Paecilomyces militaris</i>                            | 29  |
| Paecilosetin                    | 179.5                 | 100.3 | 191.6 | 197.6  | DMSO- <i>d</i> <sub>6</sub>              | CH(OH)CH <sub>3</sub>                             | H               | decalin         | N     | <i>Paecilomyces farinosus</i>                            | 30  |
| PF1052                          | 173.6                 | 103.9 | 194.1 | 190.2  | NA                                       | CH(CH <sub>3</sub> )C <sub>2</sub> H <sub>5</sub> | CH <sub>3</sub> | decalin         | N     | <i>Phoma</i> sp.                                         | 31  |
| Polycephalin B                  | 175.1                 | 101.4 | 194.3 | 173.3  | CD <sub>3</sub> OD/<br>CDCl <sub>3</sub> | CH <sub>2</sub> OH                                | CH <sub>3</sub> | alkyl           | N     | <i>Physarum polycephalum</i>                             | 32  |
| Phomasetin                      | 178.0                 | 101.6 | 191.5 | 197.5  | CD <sub>3</sub> CN                       | CH <sub>2</sub> OH                                | CH <sub>3</sub> | decalin         | N     | <i>Phoma</i> sp.                                         | 26  |
| Ravenic acid                    | 176.6                 | 99.7  | 192.4 | 174.8  | CDCl <sub>3</sub>                        | None                                              | H               | alkyl           | N     | <i>Penicillium</i> sp.                                   | 33  |
| Reutericyclin<br>(Minor isomer) | 174.8                 | 103.6 | 194.5 | 189.3  | CD <sub>3</sub> CN                       | CH <sub>2</sub> CH(CH <sub>3</sub> ) <sub>2</sub> | C(=O)alkyl      | CH <sub>3</sub> | N     | <i>Lactobacillus reuteri</i> LTH2584                     | 4   |
| Tirandalydigin*                 | 179.9                 | 99.7  | 193.5 | 186.1  | CD <sub>3</sub> OD                       | None                                              | H               | alkyl           | N     | <i>Streptomyces</i> sp. AB-1006A-9                       | 34  |
| Tirandamycin                    | 174.7*                | 100.0 | 192.4 | 176.4* | CDCl <sub>3</sub>                        | None                                              | H               | alkyl           | N     | <i>Streptomyces tirandis</i>                             | 35  |
| Xanthobaccin A*                 | 180.1                 | 102.9 | 194.5 | 183.3  | CD <sub>3</sub> OD                       | CH(OH)alkyl                                       | H               | alkyl           | N     | <i>Strenotrophomonas</i> sp.                             | 36  |



**Table S2.** Crystal data and structure refinement for **1**

|                                                              |                                                                 |                      |
|--------------------------------------------------------------|-----------------------------------------------------------------|----------------------|
| Empirical formula                                            | C <sub>20</sub> H <sub>28</sub> Cl <sub>3</sub> NO <sub>6</sub> |                      |
| Formula weight                                               | 484.78                                                          |                      |
| Temperature                                                  | 100(2) K                                                        |                      |
| Wavelength                                                   | 1.54178 Å                                                       |                      |
| Crystal system                                               | Trigonal                                                        |                      |
| Space group                                                  | P <sub>3</sub> <sub>2</sub> 21                                  |                      |
| Unit cell dimensions                                         | <i>a</i> = 11.1313(3) Å                                         | $\alpha = 90^\circ$  |
|                                                              | <i>b</i> = 11.1313(3) Å                                         | $\beta = 90^\circ$   |
|                                                              | <i>c</i> = 33.9045(9) Å                                         | $\gamma = 120^\circ$ |
| Volume                                                       | 3638.14(17) Å <sup>3</sup>                                      |                      |
| Z                                                            | 6                                                               |                      |
| Density (calculated)                                         | 1.328 g.cm <sup>-3</sup>                                        |                      |
| Absorption coefficient ( $\mu$ )                             | 3.716 mm <sup>-1</sup>                                          |                      |
| F(000)                                                       | 152                                                             |                      |
| Crystal size                                                 | 0.51 × 0.22 × 0.13 mm <sup>3</sup>                              |                      |
| $\theta$ range for data collection                           | 3.91 to 67.96°                                                  |                      |
| Index ranges                                                 | -12 ≤ <i>h</i> ≤ 13, -13 ≤ <i>k</i> ≤ 13, -40 ≤ <i>l</i> ≤ 40   |                      |
| Reflections collected                                        | 19805                                                           |                      |
| Independent reflections                                      | 4334 [ <i>R</i> <sub>int</sub> = 0.0353]                        |                      |
| Completeness to $\theta = 67.96^\circ$                       | 99.1 %                                                          |                      |
| Absorption correction                                        | numerical                                                       |                      |
| Max. and min. transmission                                   | 0.8361 and 0.4396                                               |                      |
| Refinement method                                            | Full-matrix least-squares on <i>F</i> <sup>2</sup>              |                      |
| Data / restraints / parameters                               | 4334 / 0 / 297                                                  |                      |
| Goodness-of-fit on <i>F</i> <sup>2</sup>                     | 1.023                                                           |                      |
| Final <i>R</i> indices [ <i>I</i> > 2 $\sigma$ ( <i>I</i> )] | <i>R</i> <sub>1</sub> = 0.0942, <i>wR</i> <sub>2</sub> = 0.2665 |                      |
| <i>R</i> indices (all data)                                  | <i>R</i> <sub>1</sub> = 0.1032, <i>wR</i> <sub>2</sub> = 0.2793 |                      |
| Absolute structure parameter                                 | 0.06(6)                                                         |                      |
| Largest diff. peak and hole                                  | 0.612 and -0.800 e <sup>-</sup> . Å <sup>-3</sup>               |                      |

**Table S3.** Atomic coordinates and equivalent isotropic displacement parameters ( $\text{\AA}^2$ ) for **1**

|        | x           | y           | z           | U(eq)    |
|--------|-------------|-------------|-------------|----------|
| O(1)   | 0.5253(6)   | 0.0530(4)   | 0.29296(10) | 0.062(1) |
| O(3)   | 0.6174(5)   | 0.0952(3)   | 0.22431(9)  | 0.053(1) |
| O(9)   | 0.9036(3)   | 0.2843(4)   | 0.05550(8)  | 0.042(1) |
| O(11)  | 0.6309(4)   | 0.2684(5)   | 0.06889(10) | 0.060(1) |
| O(18)  | 0.6308(6)   | 0.4970(4)   | 0.24808(10) | 0.067(1) |
| N(1)   | 0.5251(8)   | 0.2389(5)   | 0.32084(12) | 0.070(2) |
| C(1)   | 0.5490(8)   | 0.1801(6)   | 0.29103(14) | 0.056(2) |
| C(2)   | 0.6045(8)   | 0.2694(5)   | 0.25746(14) | 0.055(2) |
| C(3)   | 0.6395(7)   | 0.2168(5)   | 0.22347(13) | 0.049(1) |
| C(4)   | 0.7067(6)   | 0.3050(5)   | 0.18597(12) | 0.040(1) |
| C(5)   | 0.7598(6)   | 0.2280(5)   | 0.15921(12) | 0.039(1) |
| C(6)   | 0.8845(7)   | 0.2242(6)   | 0.17593(13) | 0.047(1) |
| C(7)   | 0.9443(6)   | 0.1642(5)   | 0.14794(15) | 0.046(1) |
| C(8)   | 0.9192(6)   | 0.1528(5)   | 0.10874(13) | 0.046(1) |
| C(9)   | 0.8343(5)   | 0.2053(5)   | 0.08960(12) | 0.040(1) |
| C(10)  | 0.7983(5)   | 0.2922(4)   | 0.11711(12) | 0.034(1) |
| C(11)  | 0.6859(5)   | 0.3154(5)   | 0.10010(12) | 0.041(1) |
| C(12)  | 0.6445(6)   | 0.3979(5)   | 0.12631(13) | 0.043(1) |
| C(13)  | 0.5890(6)   | 0.3183(5)   | 0.16551(13) | 0.040(1) |
| C(14)  | 0.4572(6)   | 0.1788(5)   | 0.15889(15) | 0.049(1) |
| C(15)  | 0.3361(8)   | 0.1912(8)   | 0.1409(2)   | 0.075(2) |
| C(16)  | 0.8277(6)   | 0.4499(5)   | 0.19766(13) | 0.046(1) |
| C(17)  | 0.9726(8)   | 0.0819(8)   | 0.08205(18) | 0.068(2) |
| C(18)  | 0.6057(9)   | 0.3943(6)   | 0.26746(14) | 0.063(2) |
| C(19)  | 0.5564(10)  | 0.3781(7)   | 0.31071(17) | 0.077(3) |
| C(1S)  | 0.196(2)    | 0.299(3)    | 0.2778(6)   | 0.110(7) |
| Cl(1)  | 0.1900(6)   | 0.1663(7)   | 0.31660(18) | 0.129(2) |
| Cl(2)  | 0.2484(5)   | 0.2625(6)   | 0.23744(17) | 0.112(2) |
| Cl(3)  | 0.0366(16)  | 0.3299(9)   | 0.28282(19) | 0.230(7) |
| C(2S)  | 0.1078(19)  | -0.2876(18) | 0.3131(5)   | 0.084(4) |
| Cl(4)  | -0.0666(6)  | -0.4017(7)  | 0.29598(13) | 0.213(3) |
| Cl(5)  | 0.1633(5)   | -0.1068(6)  | 0.31312(17) | 0.115(2) |
| O(1W)  | -0.1355(17) | 0.2253(18)  | 0.3141(4)   | 0.118(5) |
| O(2W)  | 0.2365(7)   | 0.4236(7)   | 0.2944(2)   | 0.041(2) |
| H(1A)  | 0.5340      | 0.0276      | 0.2710      | 0.093    |
| H(9)   | 0.9756      | 0.3540      | 0.0621      | 0.063    |
| H(1B)  | 0.4949      | 0.2005      | 0.3434      | 0.084    |
| H(5A)  | 0.6843      | 0.1319      | 0.1564      | 0.047    |
| H(6A)  | 0.9555      | 0.3179      | 0.1827      | 0.057    |
| H(6B)  | 0.8570      | 0.1697      | 0.2000      | 0.057    |
| H(7A)  | 1.0017      | 0.1332      | 0.1580      | 0.056    |
| H(9A)  | 0.7471      | 0.1248      | 0.0810      | 0.048    |
| H(10A) | 0.8819      | 0.3835      | 0.1197      | 0.041    |
| H(12A) | 0.5733      | 0.4100      | 0.1136      | 0.052    |
| H(12B) | 0.7240      | 0.4888      | 0.1313      | 0.052    |
| H(13A) | 0.5650      | 0.3741      | 0.1827      | 0.048    |
| H(14A) | 0.4274      | 0.1306      | 0.1839      | 0.058    |
| H(14B) | 0.4787      | 0.1229      | 0.1415      | 0.058    |
| H(15A) | 0.2554      | 0.1007      | 0.1389      | 0.112    |
| H(15B) | 0.3618      | 0.2317      | 0.1151      | 0.112    |
| H(15C) | 0.3161      | 0.2489      | 0.1575      | 0.112    |

|        |        |         |        |       |
|--------|--------|---------|--------|-------|
| H(16A) | 0.7913 | 0.5087  | 0.2051 | 0.069 |
| H(16B) | 0.8893 | 0.4901  | 0.1756 | 0.069 |
| H(16C) | 0.8774 | 0.4406  | 0.2195 | 0.069 |
| H(17A) | 1.0041 | 0.0311  | 0.0977 | 0.102 |
| H(17B) | 1.0483 | 0.1503  | 0.0666 | 0.102 |
| H(17C) | 0.8995 | 0.0193  | 0.0648 | 0.102 |
| H(19A) | 0.6289 | 0.4464  | 0.3276 | 0.093 |
| H(19B) | 0.4747 | 0.3875  | 0.3130 | 0.093 |
| H(1SA) | 0.2750 | 0.3876  | 0.2861 | 0.132 |
| H(2SA) | 0.1764 | -0.3091 | 0.3023 | 0.100 |

**Table S4.** Bond lengths [Å] and angles [°] for **1**

| atom-atom     | distance  | atom-atom     | distance  |
|---------------|-----------|---------------|-----------|
| O(1)-C(1)     | 1.305(6)  | O(3)-C(3)     | 1.249(6)  |
| O(9)-C(9)     | 1.424(5)  | O(11)-C(11)   | 1.203(6)  |
| O(18)-C(18)   | 1.224(6)  | N(1)-C(1)     | 1.302(7)  |
| N(1)-C(19)    | 1.449(7)  | C(1)-C(2)     | 1.433(7)  |
| C(2)-C(18)    | 1.424(7)  | C(2)-C(3)     | 1.432(7)  |
| C(3)-C(4)     | 1.551(6)  | C(4)-C(16)    | 1.549(7)  |
| C(4)-C(5)     | 1.554(7)  | C(4)-C(13)    | 1.554(8)  |
| C(5)-C(6)     | 1.519(8)  | C(5)-C(10)    | 1.557(5)  |
| C(6)-C(7)     | 1.495(8)  | C(7)-C(8)     | 1.351(7)  |
| C(8)-C(9)     | 1.486(8)  | C(8)-C(17)    | 1.504(8)  |
| C(9)-C(10)    | 1.535(7)  | C(10)-C(11)   | 1.512(7)  |
| C(11)-C(12)   | 1.506(8)  | C(12)-C(13)   | 1.545(6)  |
| C(13)-C(14)   | 1.528(7)  | C(14)-C(15)   | 1.547(10) |
| C(18)-C(19)   | 1.544(7)  | C(1S)-Cl(2)   | 1.62(3)   |
| C(1S)-Cl(1)   | 1.957(19) | C(1S)-Cl(3)   | 1.97(2)   |
| C(2S)-Cl(5)   | 1.785(19) | C(2S)-Cl(4)   | 1.804(19) |
| C(2S)-Cl(4)#1 | 2.013(19) | Cl(4)-C(2S)#1 | 2.013(19) |
| O(1)-H(1A)    | 0.8200    | O(9)-H(9)     | 0.8200    |
| N(1)-H(1B)    | 0.8600    | C(5)-H(5A)    | 0.9800    |
| C(6)-H(6A)    | 0.9700    | C(6)-H(6B)    | 0.9700    |
| C(7)-H(7A)    | 0.9300    | C(9)-H(9A)    | 0.9800    |
| C(10)-H(10A)  | 0.9800    | C(12)-H(12A)  | 0.9700    |
| C(12)-H(12B)  | 0.9700    | C(13)-H(13A)  | 0.9800    |
| C(14)-H(14A)  | 0.9700    | C(14)-H(14B)  | 0.9700    |
| C(15)-H(15A)  | 0.9600    | C(15)-H(15B)  | 0.9600    |
| C(15)-H(15C)  | 0.9600    | C(16)-H(16A)  | 0.9600    |
| C(16)-H(16B)  | 0.9600    | C(16)-H(16C)  | 0.9600    |
| C(17)-H(17A)  | 0.9600    | C(17)-H(17B)  | 0.9600    |
| C(17)-H(17C)  | 0.9600    | C(19)-H(19A)  | 0.9700    |
| C(19)-H(19B)  | 0.9700    | C(1S)-H(1SA)  | 0.9800    |
| C(2S)-H(2SA)  | 0.9800    |               |           |

Symmetry transformations used to generate equivalent atoms:

#1 -x,-x+y,-z+2/3

**Table S5.** Anisotropic displacement parameters ( $\text{\AA}^2 \times 10^3$ ) for **1**The anisotropic displacement factor exponent takes the form:  $-2\pi^2[h^2a^{*2}U_{11} + \dots + 2hka^*b^*U_{12}]$ 

|       | $U_{11}$   | $U_{22}$   | $U_{33}$   | $U_{23}$    | $U_{13}$    | $U_{12}$    |
|-------|------------|------------|------------|-------------|-------------|-------------|
| O(1)  | 0.129(4)   | 0.045(2)   | 0.0283(16) | 0.0086(15)  | 0.019(2)    | 0.057(3)    |
| O(3)  | 0.110(3)   | 0.0311(17) | 0.0298(16) | 0.0054(14)  | 0.0216(19)  | 0.044(2)    |
| O(9)  | 0.0303(16) | 0.0450(19) | 0.0206(13) | 0.0005(13)  | 0.0001(12)  | -0.0032(14) |
| O(11) | 0.043(2)   | 0.089(3)   | 0.0250(16) | -0.0068(18) | -0.0022(15) | 0.016(2)    |
| O(18) | 0.146(4)   | 0.040(2)   | 0.0316(16) | 0.0108(16)  | 0.025(2)    | 0.060(3)    |
| N(1)  | 0.157(6)   | 0.054(3)   | 0.0255(19) | 0.014(2)    | 0.033(3)    | 0.073(4)    |
| C(1)  | 0.116(5)   | 0.040(3)   | 0.024(2)   | 0.006(2)    | 0.017(3)    | 0.047(3)    |
| C(2)  | 0.120(5)   | 0.038(3)   | 0.024(2)   | 0.007(2)    | 0.015(3)    | 0.053(3)    |
| C(3)  | 0.096(4)   | 0.032(2)   | 0.024(2)   | 0.0066(18)  | 0.012(2)    | 0.035(3)    |
| C(4)  | 0.072(3)   | 0.023(2)   | 0.0198(18) | -0.0008(17) | 0.005(2)    | 0.020(2)    |
| C(5)  | 0.065(3)   | 0.023(2)   | 0.0192(19) | 0.0001(16)  | 0.006(2)    | 0.015(2)    |
| C(6)  | 0.078(4)   | 0.039(3)   | 0.025(2)   | 0.0006(19)  | 0.000(2)    | 0.029(3)    |
| C(7)  | 0.064(3)   | 0.038(3)   | 0.036(2)   | 0.003(2)    | 0.004(2)    | 0.024(2)    |
| C(8)  | 0.059(3)   | 0.030(2)   | 0.032(2)   | 0.0005(19)  | 0.012(2)    | 0.010(2)    |
| C(9)  | 0.038(2)   | 0.032(2)   | 0.0215(19) | -0.0043(18) | 0.0024(18)  | -0.0044(19) |
| C(10) | 0.039(2)   | 0.025(2)   | 0.0231(19) | 0.0025(16)  | 0.0023(17)  | 0.0037(17)  |
| C(11) | 0.040(2)   | 0.041(3)   | 0.0194(19) | 0.0056(18)  | 0.0057(18)  | 0.003(2)    |
| C(12) | 0.055(3)   | 0.031(2)   | 0.031(2)   | 0.0071(19)  | 0.002(2)    | 0.012(2)    |
| C(13) | 0.063(3)   | 0.027(2)   | 0.027(2)   | -0.0002(17) | 0.008(2)    | 0.021(2)    |
| C(14) | 0.067(3)   | 0.025(2)   | 0.040(2)   | 0.0008(19)  | 0.020(2)    | 0.012(2)    |
| C(15) | 0.057(4)   | 0.054(4)   | 0.088(5)   | 0.008(4)    | -0.005(4)   | 0.009(3)    |
| C(16) | 0.076(4)   | 0.026(2)   | 0.026(2)   | -0.0036(18) | -0.006(2)   | 0.018(2)    |
| C(17) | 0.088(5)   | 0.073(4)   | 0.042(3)   | -0.004(3)   | 0.020(3)    | 0.040(4)    |
| C(18) | 0.132(6)   | 0.048(3)   | 0.027(2)   | 0.006(2)    | 0.016(3)    | 0.059(4)    |
| C(19) | 0.169(8)   | 0.048(3)   | 0.038(3)   | 0.014(3)    | 0.036(4)    | 0.072(5)    |
| C(1S) | 0.097(13)  | 0.132(17)  | 0.106(14)  | 0.019(12)   | -0.051(12)  | 0.061(12)   |
| Cl(1) | 0.090(3)   | 0.140(5)   | 0.126(4)   | 0.075(4)    | 0.000(3)    | 0.033(3)    |
| Cl(2) | 0.085(3)   | 0.118(4)   | 0.116(4)   | 0.052(3)    | 0.007(3)    | 0.037(3)    |
| Cl(3) | 0.49(2)    | 0.143(6)   | 0.092(4)   | 0.041(4)    | 0.056(7)    | 0.187(10)   |
| Cl(4) | 0.207(5)   | 0.296(7)   | 0.143(3)   | -0.141(4)   | -0.088(3)   | 0.132(5)    |
| Cl(5) | 0.078(3)   | 0.136(4)   | 0.122(4)   | -0.061(4)   | -0.027(3)   | 0.047(3)    |

**Table S6.** Torsion angles [°] for **1**

| atom-atom-atom-atom  | angle     | atom-atom-atom-atom         | angle     | atom-atom-atom-atom | angle |
|----------------------|-----------|-----------------------------|-----------|---------------------|-------|
| C(19)-N(1)-C(1)-O(1) | -178.5(8) | C(19)-N(1)-C(1)-C(2)        | 2.5(10)   | N(1)-C(1)-C(2)-     |       |
| C(18)                | -4.2(9)   | O(1)-C(1)-C(2)-C(18)        | 176.8(8)  | N(1)-C(1)-C(2)-     |       |
| C(3)                 | 177.7(7)  | O(1)-C(1)-C(2)-C(3)         | -1.2(12)  | C(18)-C(2)-C(3)-    |       |
| O(3)                 | -175.8(9) | C(1)-C(2)-C(3)-O(3)         | 1.5(10)   | C(18)-C(2)-C(3)-    |       |
| C(4)                 | 5.6(14)   | C(1)-C(2)-C(3)-C(4)         | -177.1(6) | O(3)-C(3)-C(4)-     |       |
| C(16)                | -132.4(6) | C(2)-C(3)-C(4)-C(16)        | 46.2(8)   | O(3)-C(3)-C(4)-     |       |
| C(5)                 | -11.0(8)  | C(2)-C(3)-C(4)-C(5)         | 167.6(6)  | O(3)-C(3)-C(4)-     |       |
| C(13)                | 108.5(6)  | C(2)-C(3)-C(4)-C(13)        | -72.9(7)  | C(16)-C(4)-C(5)-    |       |
| C(6)                 | 51.1(5)   | C(3)-C(4)-C(5)-C(6)         | -70.0(6)  | C(13)-C(4)-C(5)-    |       |
| C(6)                 | 174.3(4)  | C(16)-C(4)-C(5)-C(10)       | -71.8(5)  | C(3)-C(4)-C(5)-     |       |
| C(10)                | 167.2(4)  | C(13)-C(4)-C(5)-C(10)       | 51.5(5)   | C(4)-C(5)-C(6)-     |       |
| C(7)                 | -173.5(4) | C(10)-C(5)-C(6)-C(7)        | -48.5(5)  | C(5)-C(6)-C(7)-     |       |
| C(8)                 | 18.4(7)   | C(6)-C(7)-C(8)-C(9)         | 2.9(8)    | C(6)-C(7)-C(8)-     |       |
| C(17)                | -175.3(6) | C(7)-C(8)-C(9)-O(9)         | 132.3(5)  | C(17)-C(8)-C(9)-    |       |
| O(9)                 | -49.4(6)  | C(7)-C(8)-C(9)-C(10)        | 9.0(7)    | C(17)-C(8)-C(9)-    |       |
| C(10)                | -172.7(5) | O(9)-C(9)-C(10)-C(11)       | 69.8(5)   | C(8)-C(9)-C(10)-    |       |
| C(11)                | -166.6(4) | O(9)-C(9)-C(10)-C(5)        | -164.5(4) | C(8)-C(9)-C(10)-    |       |
| C(5)                 | -40.9(5)  | C(6)-C(5)-C(10)-C(11)       | -173.4(4) | C(4)-C(5)-C(10)-    |       |
| C(11)                | -47.4(5)  | C(6)-C(5)-C(10)-C(9)        | 60.6(5)   | C(4)-C(5)-C(10)-    |       |
| C(9)                 | -173.4(4) | C(9)-C(10)-C(11)-O(11)      | 1.1(6)    | C(5)-C(10)-C(11)-   |       |
| O(11)                | -124.6(5) | C(9)-C(10)-C(11)-C(12)      | 178.9(4)  | C(5)-C(10)-C(11)-   |       |
| C(12)                | 53.1(5)   | O(11)-C(11)-C(12)-C(13)     | 117.3(5)  | C(10)-C(11)-C(12)-  |       |
| C(13)                | -60.5(5)  | C(11)-C(12)-C(13)-C(14)     | -63.9(6)  | C(11)-C(12)-C(13)-  |       |
| C(4)                 | 61.7(5)   | C(16)-C(4)-C(13)-C(14)      | -171.1(4) | C(3)-C(4)-C(13)-    |       |
| C(14)                | -52.4(5)  | C(5)-C(4)-C(13)-C(14)       | 65.6(5)   | C(16)-C(4)-C(13)-   |       |
| C(12)                | 64.5(5)   | C(3)-C(4)-C(13)-C(12)       | -176.7(4) | C(5)-C(4)-C(13)-    |       |
| C(12)                | -58.7(5)  | C(12)-C(13)-C(14)-C(15)     | -60.5(6)  | C(4)-C(13)-C(14)-   |       |
| C(15)                | 176.4(5)  | C(1)-C(2)-C(18)-O(18)       | -172.2(9) | C(3)-C(2)-C(18)-    |       |
| O(18)                | 5.4(17)   | C(1)-C(2)-C(18)-C(19)       | 3.9(9)    | C(3)-C(2)-C(18)-    |       |
| C(19)                | -178.5(9) | C(1)-N(1)-C(19)-C(18)       | 0.1(10)   | O(18)-C(18)-C(19)-  |       |
| N(1)                 | 174.1(8)  | C(2)-C(18)-C(19)-N(1)       | -2.5(9)   | Cl(5)-C(2S)-Cl(4)-  |       |
| C(2S)#1              | -89.0(9)  | Cl(4)#1-C(2S)-Cl(4)-C(2S)#1 | 17.1(11)  |                     |       |

Symmetry transformations used to generate equivalent atoms:

#1 -x,-x+y,-z+2/3

**Table S7.** Hydrogen coordinates ( $\times 10^4$ ) and isotropic displacement parameters ( $\text{\AA}^2 \times 10^3$ ) for **1**

---

| D-H...A              | d(D-H) | d(H...A) | d(D...A) | <(DHA) |
|----------------------|--------|----------|----------|--------|
| O(1)-H(1A)...O(3)    | 0.82   | 1.80     | 2.491(5) | 141.3  |
| O(9)-H(9)...O(18)#2  | 0.82   | 1.88     | 2.696(4) | 171.2  |
| N(1)-H(1B)...O(9)#3  | 0.86   | 1.96     | 2.804(6) | 165.7  |
| N(1)-H(1B)...O(11)#3 | 0.86   | 2.65     | 3.077(6) | 111.7  |

Symmetry transformations used to generate equivalent atoms:

#1 -x,-x+y,-z+2/3 #2 x-y+1,-y+1,-z+1/3 #3 -x+y+1,-x+1,z+1/3

## References

- (1) Gunasekera, S. P.; Gunasekera, M.; McCarthy, P. *J. Org. Chem.* **1991**, *56*, 4830-4833.
- (2) Wright, A. D.; Osterhage, C.; Konig, G. M. *Org. Biomol. Chem.* **2003**, *1*, 507-510.
- (3) Wangun, H. V. K.; Dahse, H.-M.; Hertweck, C. *J. Nat. Prod.* **2007**, *70*, 1800-1803.
- (4) Holtzel, A.; Ganzle, M. G.; Nicholson, G. J.; Hammes, W. P.; Jung, G. *Angew. Chem. Int. Ed.* **2000**, *39*, 2766-2768.
- (5) Shigemori, H.; Bae, M. A.; Yazawa, K.; Sasaki, T.; Kobayashi, J. *J. Org. Chem.* **1992**, *57*, 4317-4320.
- (6) Hellwig, V.; Grothe, T.; Mayer-Bartschmid, A.; Endermann, R.; Geschke, F. U.; Henkel, T.; Stadler, M. *J. Antibiot.* **2002**, *55*, 881-892.
- (7) Toda, S.; Yamamoto, S.; Tenmyo, O.; Tsuno, T.; Hasegawa, T.; Rosser, M.; Oka, M.; Sawada, Y.; Konishi, M.; Oki, T. *J. Antibiot.* **1993**, *46*, 875-883.
- (8) Sugie, Y.; Dekker, K. A.; Inagaki, T.; Kim, Y. J.; Sakakibara, T.; Sakemi, S.; Sugiura, A.; Brennan, L.; Duignan, J.; Sutcliffe, J. A.; Kojima, Y. *J. Antibiot.* **2002**, *55*, 19-24.
- (9) Ueno, M.; Someno, T.; Sawa, R.; Iinuma, H.; Naganawa, H.; Ishizuka, M.; Takeuchi, T. *J. Antibiot.* **1993**, *46*, 979-984.
- (10) Beutler, J. A.; Hilton, B. D.; Clark, P.; Tempesta, M. S.; Corley, D. G. *J. Nat. Prod.* **1988**, *51*, 562-566.
- (11) Casser, I.; Steffan, B.; Steglich, W. *Angew. Chem. Int. Ed. Engl.* **1987**, *26*, 586-587.
- (12) Singh, S. B.; Zink, D. L.; Heimbach, B.; Genilloud, O.; Teran, A.; Silverman, K. C.; Lingham, R. B.; Felock, P.; Hazuda, D. J. *Org. Lett.* **2002**, *4*, 1123-1126.
- (13) Hayakawa, Y.; Kanamaru, N.; Morisaki, N.; Seto, H. *Tetrahedron Lett.* **1991**, *32*, 213-216.
- (14) He, H. Y.; Janso, J. E.; Yang, H. Y.; Singh, M. P.; Bernan, V. S.; Greenstein, M.; Carter, G. T. *J. Antibiot.* **2002**, *55*, 821-825.
- (15) Lana, G.; Cole, A. L. J.; Blunt, J. W.; Munro, M. H. G. *J. Nat. Prod.* **2006**, *69*, 151-153.
- (16) Ondeyka, J.; Harris, G.; Zink, D.; Basilio, A.; Vicente, F.; Bills, G.; Platas, G.; Collado, J.; Gonzalez, A.; de la Cruz, M.; Martin, J.; Kahn, J. N.; Galuska, S.; Giacobbe, R.; Abruzzo, G.; Hickey, E.; Liberator, P.; Jiang, B.; Xu, D.; Roemer, T.; Singh, S. B. *J. Nat. Prod.* **2009**, *72*, 136-141.
- (17) Ono, M.; Sakuda, S.; Ikeda, H.; Furihata, K.; Nakayama, J.; Suzuki, A.; Isogai, A. *J. Antibiot.* **1998**, *51*, 1019-1028.
- (18) Ohta, S.; Ohta, E.; Ikegami, S. *J. Org. Chem.* **1997**, *62*, 6452-6453.
- (19) Matsunaga, S.; Fusetani, N.; Kato, Y.; Hirota, H. *J. Am. Chem. Soc.* **1991**, *113*, 9690-9692.
- (20) Sata, N. U.; Matsunaga, S.; Fusetani, N.; van Soest, R. W. M. *J. Nat. Prod.* **1999**, *62*, 969-971.
- (21) Sakuda, S.; Ono, M.; Ikeda, H.; Nakamura, T.; Inagaki, Y.; Kawachi, R.; Nakayama, J.; Suzuki, A.; Isogai, A.; Nagasawa, H. *J. Antibiot.* **2000**, *53*, 1265-1271.
- (22) Boros, C.; Dix, A.; Katz, B.; Vasina, Y.; Pearce, C. *J. Antibiot.* **2003**, *56*, 862-865.
- (23) Sugie, Y.; Inagaki, S.; Kato, Y.; Nishida, H.; Pang, C. H.; Saito, T.; Sakemi, S.; Dib-Hajj, F.; Mueller, J. P.; Sutcliffe, J.; Kojima, Y. *J. Antibiot.* **2002**, *55*, 25-29.
- (24) Segeth, M. P.; Bonnefoy, A.; Bronstrup, M.; Knauf, M.; Schummer, D.; Toti, L.; Vertesy, L.; Wetzel-Raynal, M. C.; Wink, J.; Seibert, G. *J. Antibiot.* **2003**, *56*, 114-122.
- (25) Kemami Wangun, H. V.; Hertweck, C. *Org. Biomol. Chem.* **2007**, *5*, 1702-1705.
- (26) Singh, S. B.; Zink, D. L.; Goetz, M. A.; Dombrowski, A. W.; Polishook, J. D.; Hazuda, D. J. *Tetrahedron Lett.* **1998**, *39*, 2243-2246.
- (27) Sawa, R.; Mori, Y.; Iinuma, H.; Naganawa, H.; Hamada, M.; Yoshida, S.; Furutani, H.; Kajimura, Y.; Fuwa, T.; Takeuchi, T. *J. Antibiot.* **1994**, *47*, 731-732.
- (28) Graupner, P. R.; Carr, A.; Clancy, E.; Gilbert, J.; Bailey, K. L.; Derby, J. A.; Gerwick, B. C. *J. Nat. Prod.* **2003**, *66*, 1558-1561.
- (29) Schmidt, K.; Riese, U.; Li, Z. Z.; Hamburger, M. *J. Nat. Prod.* **2003**, *66*, 378-383.
- (30) Lang, G.; Blunt, J. W.; Cummings, N. J.; Cole, A. L. J.; Munro, M. H. G. *J. Nat. Prod.* **2005**, *68*, 810-811.
- (31) Koyama, N.; Nagahiro, T.; Yamaguchi, Y.; Ohshiro, T.; Masuma, R.; Tomoda, H.; Omura, S. *J. Antibiot.* **2005**, *58*, 338-345.
- (32) Steffan, B.; Nowak, A. *Angew. Chem. Int. Ed.* **1999**, *38*, 1695-1695.
- (33) Michael, A. P.; Grace, E. J.; Kotiw, M.; Barrow, R. A. *J. Nat. Prod.* **2002**, *65*, 1360-1362.
- (34) Brill, G. M.; McAlpine, J. B.; Whittern, D. *J. Antibiot.* **1988**, *41*, 36-44.
- (35) Lee, V. J.; Rinehart, K. L. *J. Antibiot.* **1980**, *33*, 408-415.
- (36) Hashidoko, Y.; Nakayama, T.; Homma, Y.; Tahara, S. *Tetrahedron Lett.* **1999**, *40*, 2957-2960.
