# Supplementary material
Source: PubMed Central journal article supplement (PMC3532527)
Supplement: NIHMS423193-supplement-2_si_002.pdf [file NIHMS423193-supplement-2_si_002.pdf]

Supporting Information for

**Creation of an HDAC-Based Yeast Screening Method for Evaluation of Marine-Derived Actinomycetes: Discovery of Streptosetin A**

**Part 2**

*Taro Amagata,<sup>†,\*</sup> Jing Xiao,<sup>†</sup> Yi-Pei Chen,<sup>†</sup> Nicholas Holsopple,<sup>†</sup> Allen G. Oliver,<sup>‡</sup> Trevor Gokey,<sup>†</sup> Anton B. Guliaev,<sup>†</sup> Katsuhiko Minoura<sup>§</sup>*

<sup>†</sup>Department of Chemistry and Biochemistry, San Francisco State University, San Francisco, CA 94132, <sup>‡</sup>Department Chemistry and Biochemistry, University of Notre Dame, Notre Dame, 46556, <sup>§</sup>Osaka University of Pharmaceutical Sciences, Takatsuki, Osaka 569-1094, Japan

## Table of Contents

### Part 2

#### [Figures]

**Figure S6.** HRESIMS spectrum of **1**

**Figure S7.**  $^1\text{H}$  NMR spectrum of **1** in  $\text{CD}_3\text{OD}$  (500 MHz)

**Figure S8.**  $^{13}\text{C}$  NMR spectrum of **1** in  $\text{CD}_3\text{OD}$  (125 MHz)

**Figure S9.**  $^{13}\text{C}$  NMR spectrum of **1** in  $\text{CD}_3\text{OD}$  (75 MHz)

**Figure S10.** gCOSY spectrum of **1** in  $\text{CD}_3\text{OD}$  (500 MHz)

**Figure S11.** gHSQC spectrum of **1** in  $\text{CD}_3\text{OD}$  (500 MHz)

**Figure S12.** gHMBC spectrum of **1** in  $\text{CD}_3\text{OD}$  (500 MHz)

**Figure S13.** NOESY spectrum of **1** in  $\text{CD}_3\text{OD}$  (500 MHz)

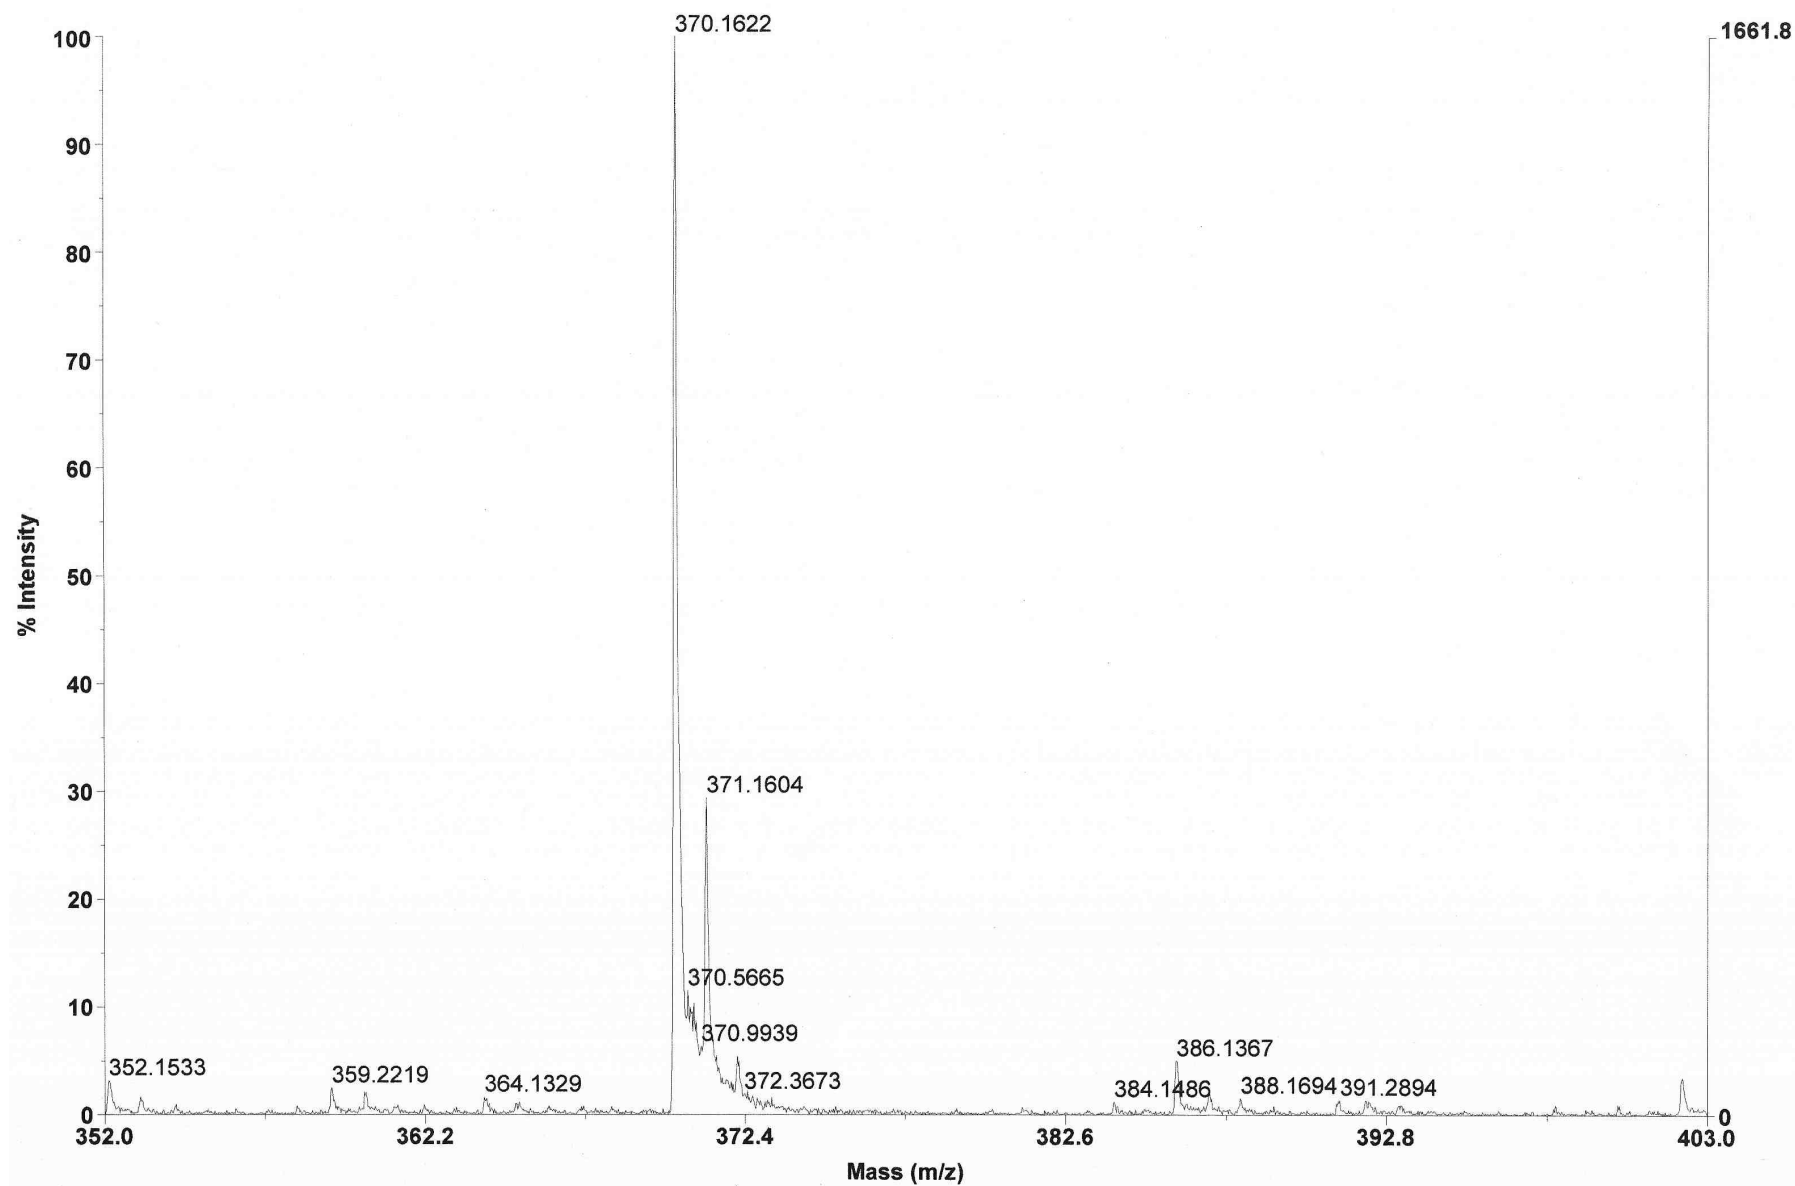

Figure S6. HRESIMS spectrum of 1

```

PC1
0908109C1H16H26-30

exp31 stdlh

SAMPLE          DEC. & VT
date Nov 24 2010 dfrq 499.562
solvent CD3OD   dn      H1
file      exp   dpwr    13
ACQUISITION dof      0
sfrq 499.563  dm      mn
tn      H1    dmm      c
at      3.500  dmf     200
np      52480
sw      7497.7 wtfile
fb      4000  proc      ft
bs      4     fn      not used
tpwr    55
pw      7.0  werr      react
dl      3.000 wexp     procplot
tof     800.0 wbs
nt      128  wnt
ct      128
alock   n
gain   not used

FLAGS
il      n
in      n
dp      y

DISPLAY
sp      -50.1
wp      5045.5
vs      108
sc      0
wc      370
hzmm    20.26
is      2074.59
rfl     452.8
rfp     0
th      6
ins     100.000
ai      ph

```

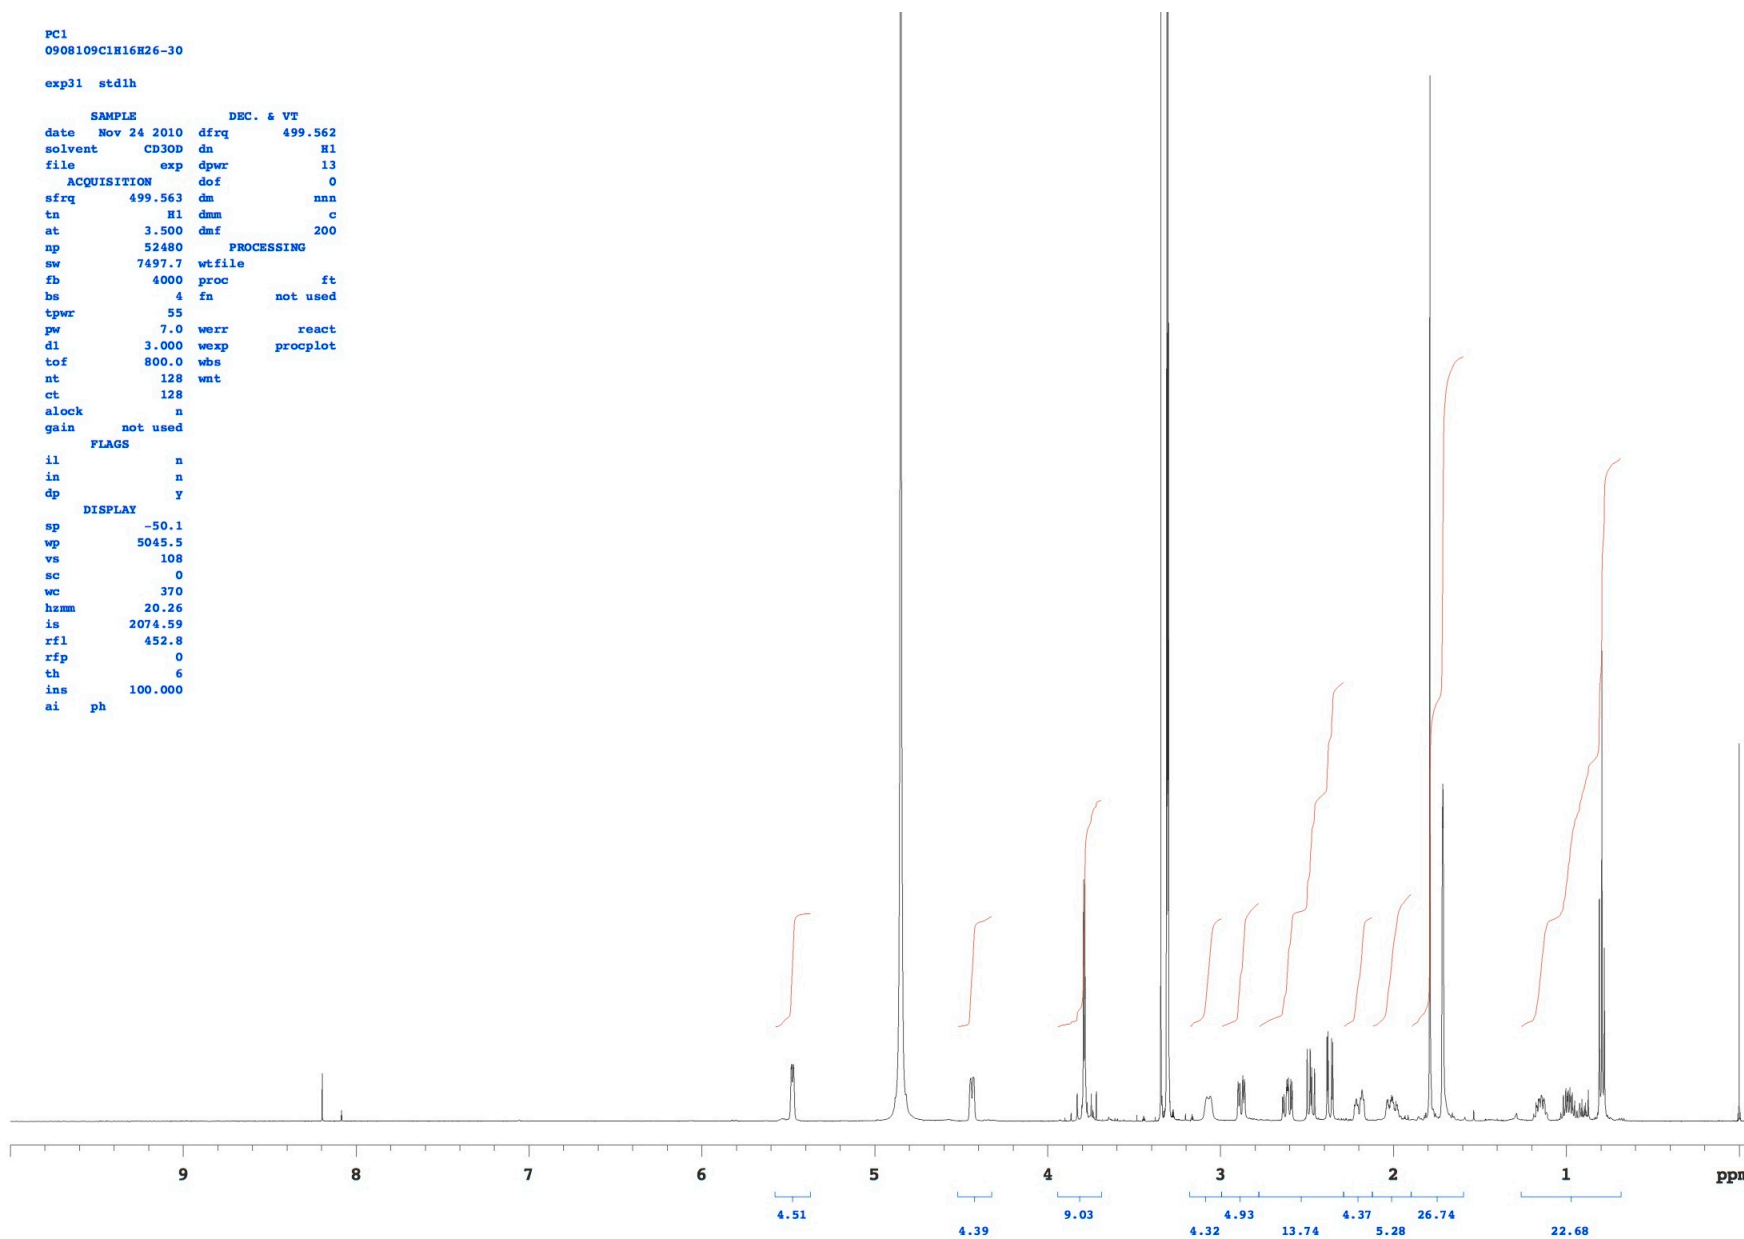

Figure S7. <sup>1</sup>H NMR spectrum of 1 in CD<sub>3</sub>OD (500 MHz)

PC1  
0908109C1H16H26-30

exp32 std13c

```
SAMPLE          DEC. & VT
date Nov 24 2010 dfrq      499.562
solvent CD3OD  dn         H1
file      exp  dpwr       36
ACQUISITION
sfrq     125.628  dm       YYY
tn       C13    dmm       g
at       1.500  dmf      11000
np       94272  PROCESSING
sw       31421.8 lb        1.00
fb       17000  wtfile
bs       16    proc       ft
tpwr     57    fn        not used
pw       8.5
d1       2.000  werr      react
tof      1800.0 wexp     procp1ot
nt       20000 wbs
ct       19680 wnt
alock    n
gain     not used
FLAGS
il       n
in       n
dp       y
DISPLAY
sp       -0.0
wp       27635.1
vs       14071
sc       0
wc       370
hzmm     74.69
is       397.17
rfl      1821.5
rfp      0
th       2
ins      100.000
ai      ph
```

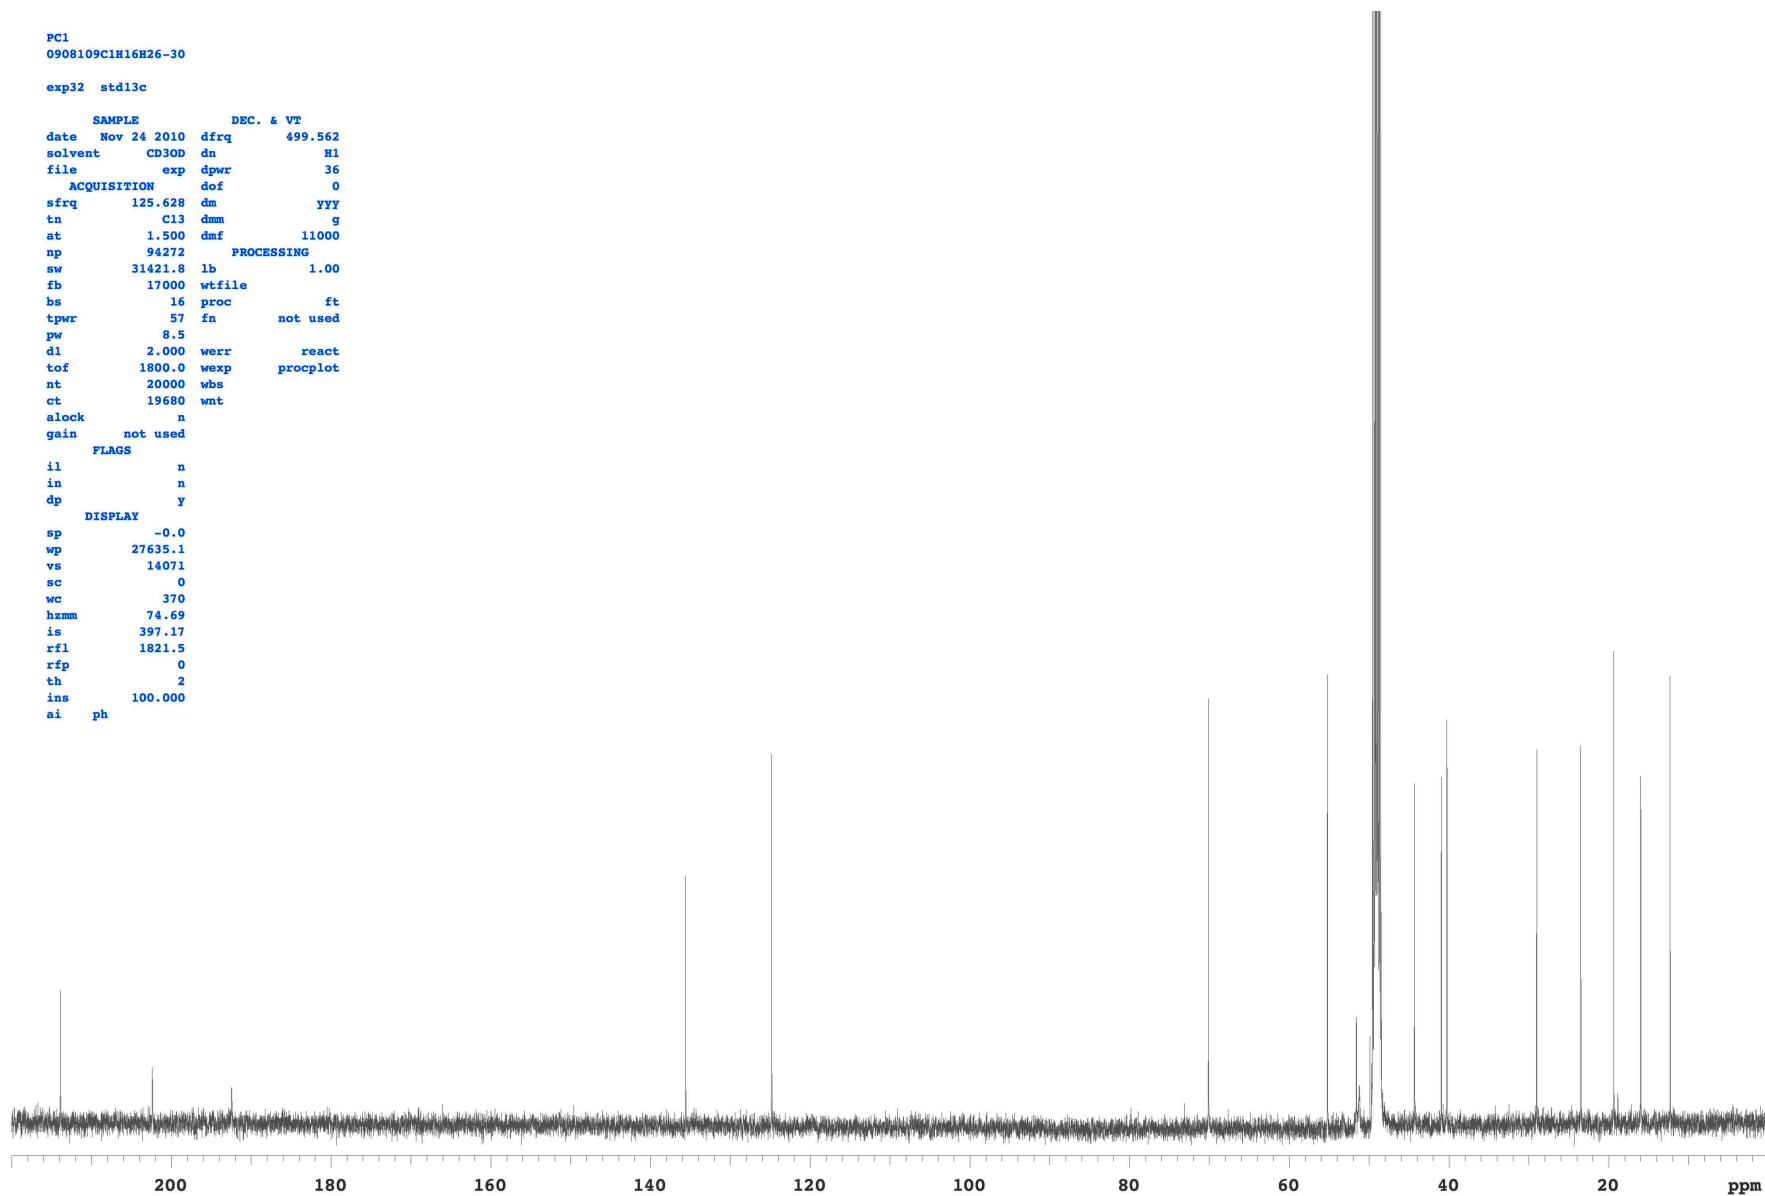

Figure S8.  $^{13}\text{C}$  NMR spectrum of **1** in  $\text{CD}_3\text{OD}$  (125 MHz)

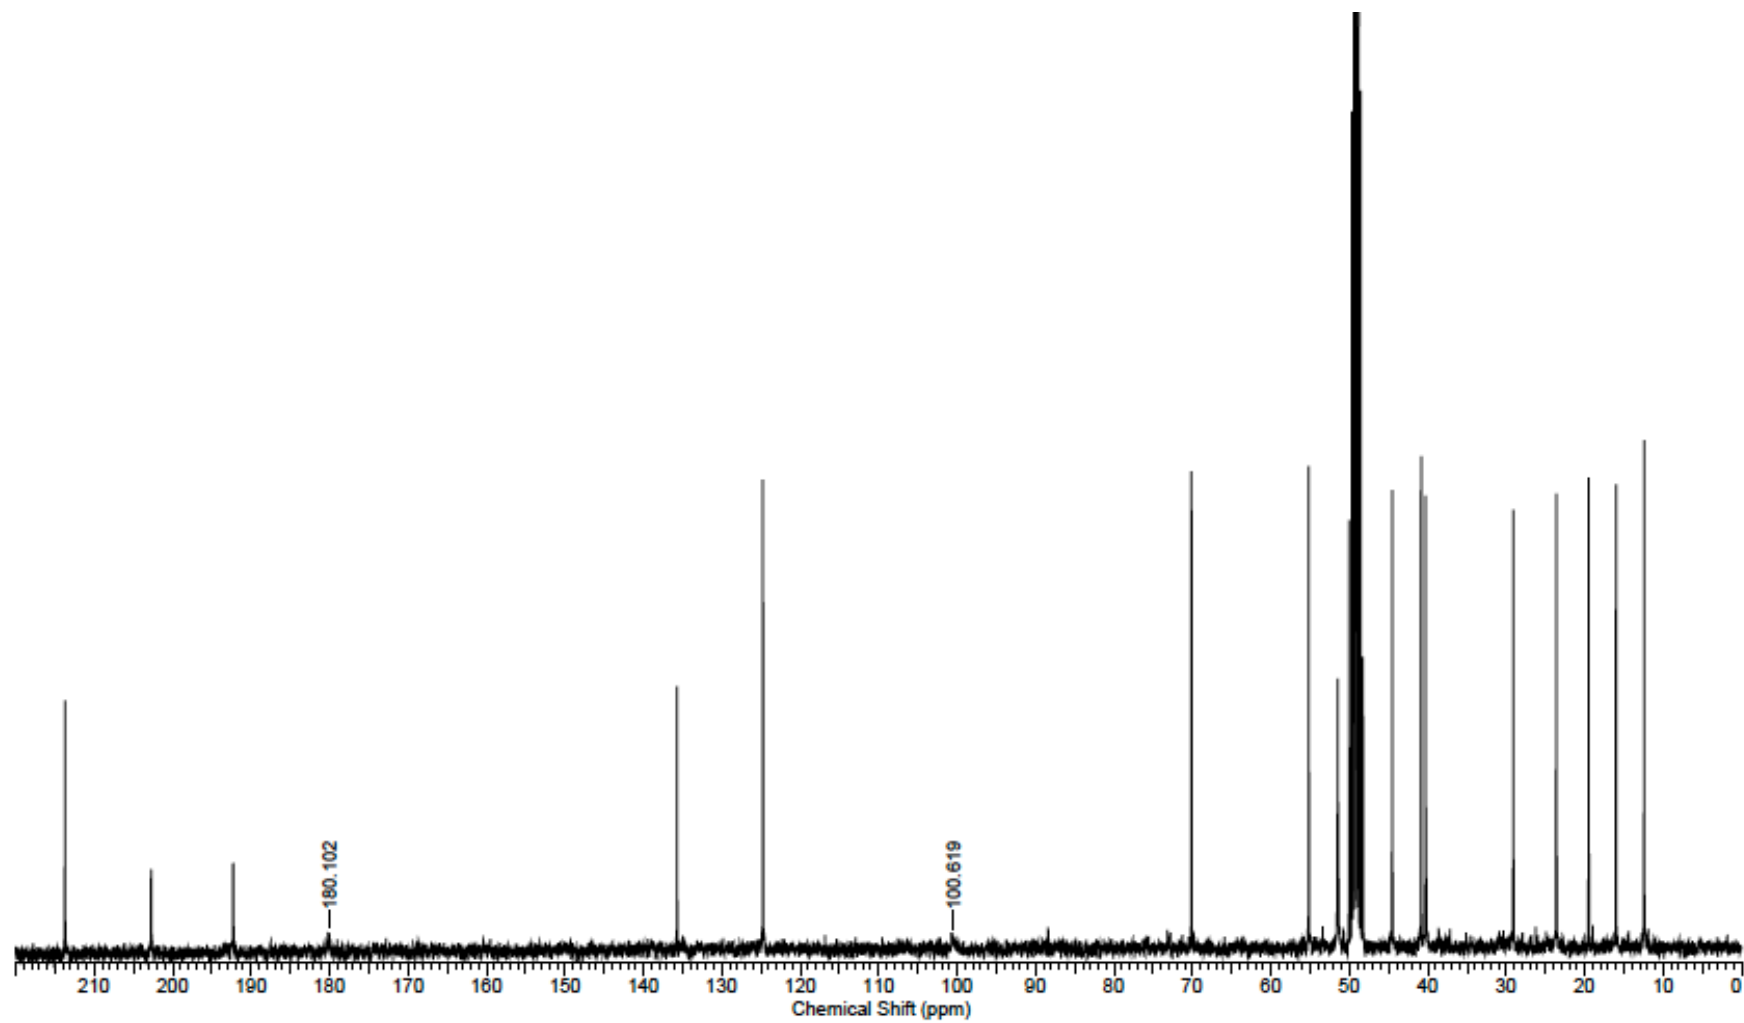

**Figure S9.**  $^{13}\text{C}$  NMR spectrum of 1 in  $\text{CD}_3\text{OD}$  (75 MHz)

```

PC1
0908109C1H16H26-30

exp33 gCOSY

SAMPLE          FLAGS
date Nov 26 2010 hs      nn
solvent CD3OD  sspul    n
sample undefined hsglv1 4414
ACQUISITION     SPECIAL
sw 3086.1 temp not used
at 0.166 gain 48
np 1024 spin not used
fb 2000 F2 PROCESSING
ss 16 sb -0.083
dl 1.000 sbs not used
nt 16 fn 1024
2D ACQUISITION  F1 PROCESSING
sw1 3086.1 sb1 -0.041
ni 256 sbs1 not used
TRANSMITTER     procl 1p
tn H1 fn1 1024
sfrq 499.561 DISPLAY
tof -1054.7 sp 247.9
tpwr 53 wp 2634.0
pw 9.500 sp1 247.9
GRADIENTS       wp1 2628.0
gzlv11 4414 rfl 101.7
gt1 0.001000 rfp 0
gstab 0.000500 rfl1 101.7
DECOUPLER       rfp1 0
dn H1 PLOT
dm nnn wc 200.0
sc 0
wc2 200.0
sc2 0
vs 7192
th 3
ai av

```

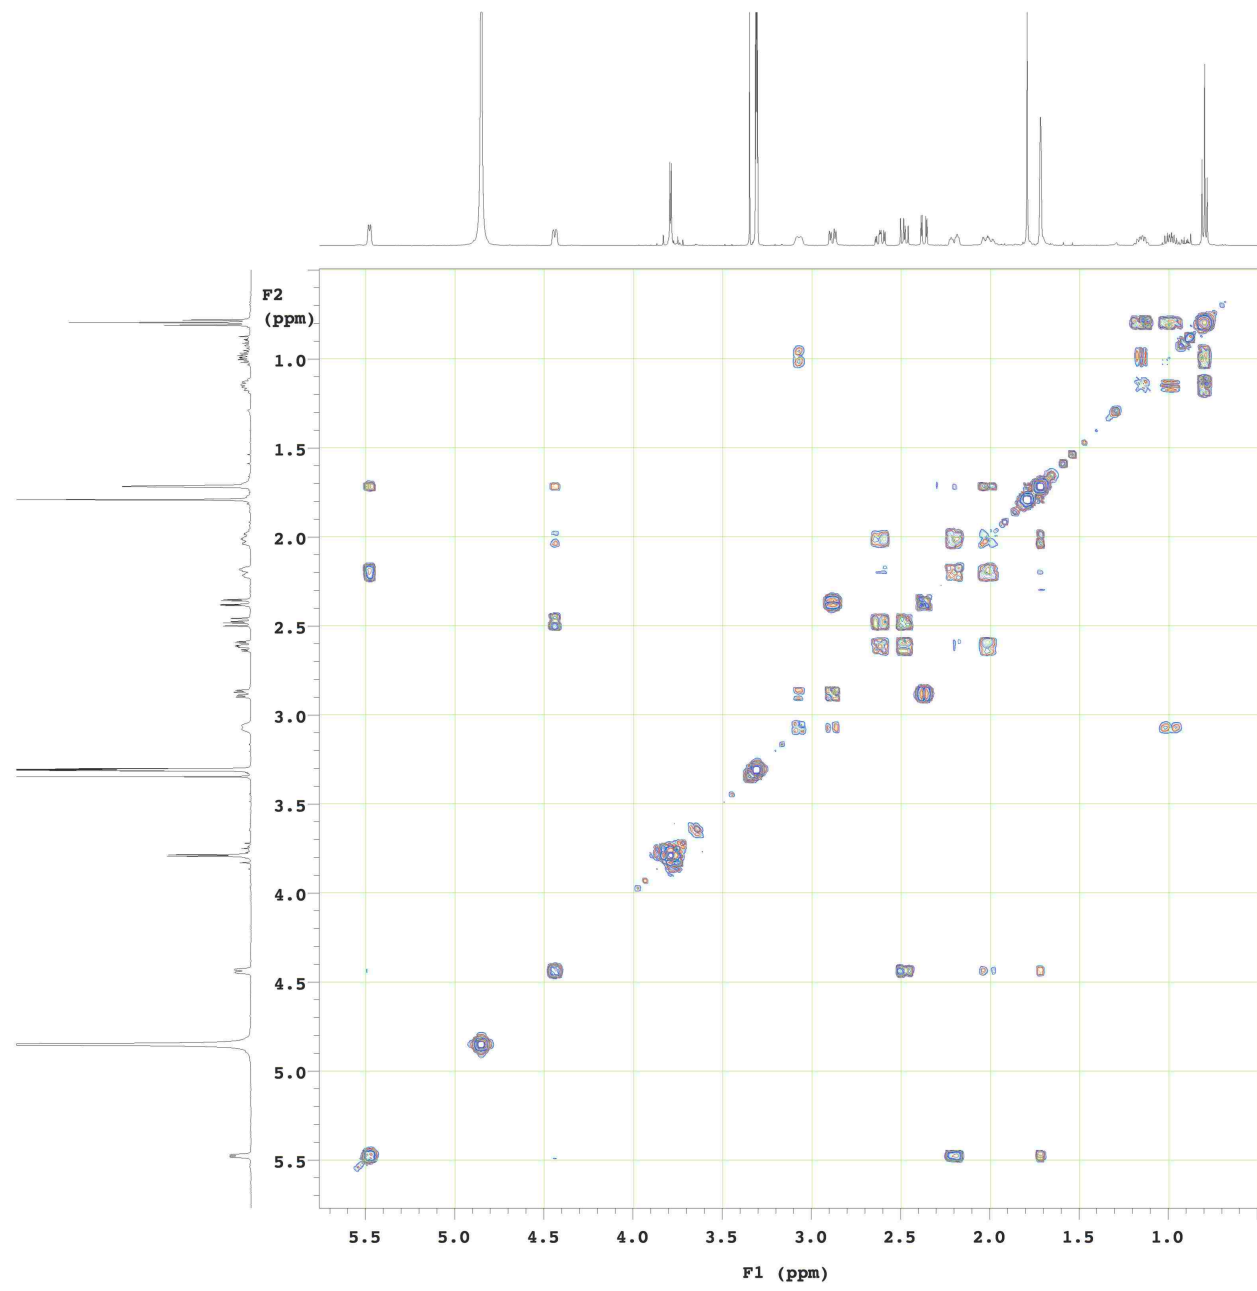

Figure S10. gCOSY spectrum of **1** in CD<sub>3</sub>OD (500 MHz)

PC1  
0908109C1H16H26-30

exp35 gHSQC

| SAMPLE           | FLAGS         | ACQUISITION ARRAYS |
|------------------|---------------|--------------------|
| date Nov 26 2010 | hs            | n                  |
| solvent CD3OD    | sapul         | n                  |
| sample undefined | PFGflg        | y                  |
| ACQUISITION      | hsglvl        | 4414               |
| sw 3147.0        | SPECIAL       | 1                  |
| at 0.163         | temp          | not used           |
| np 1024          | gain          | 60                 |
| fb 2000          | spin          | 0                  |
| ss 32            | GRADIENTS     |                    |
| dl 1.500         | gzlvl1        | 4414               |
| nt 16            | gt1           | 0.002000           |
| 2D ACQUISITION   | gzlvl3        | 2207               |
| sw1 19426.9      | gt3           | 0.001000           |
| ni 512           | gstab         | 0.000500           |
| phase arrayed    | F2 PROCESSING |                    |
| TRANSMITTER      | gf            | 0.075              |
| tn H1            | gfs           | not used           |
| sfrq 499.561     | fn            | 1024               |
| tof -1067.8      | F1 PROCESSING |                    |
| tpwr 53          | gf1           | 0.011              |
| pw 9.500         | gfs1          | not used           |
| DECOUPLER        | procl         | lp                 |
| dn C13           | fn1           | 2048               |
| dof -3698.8      | DISPLAY       |                    |
| dm nny           | sp            | 260.4              |
| dmm ccp          | wp            | 2729.0             |
| dmf 11111        | sp1           | 915.5              |
| dpwr 45          | vp1           | 15746.4            |
| pwxlvl 61        | rf1           | 145.3              |
| pw 16.500        | rfp           | 0                  |
| HSQC             | rf11          | 7483.7             |
| jlhx 140.0       | rfpl          | 6160.6             |
| nullflg n        | PLOT          |                    |
| mult 2           | wc            | 240.0              |
|                  | sc            | 0                  |
|                  | wc2           | 200.0              |
|                  | sc2           | 0                  |
|                  | vs            | 1835               |
|                  | th            | 3                  |
|                  | ai            | ph                 |

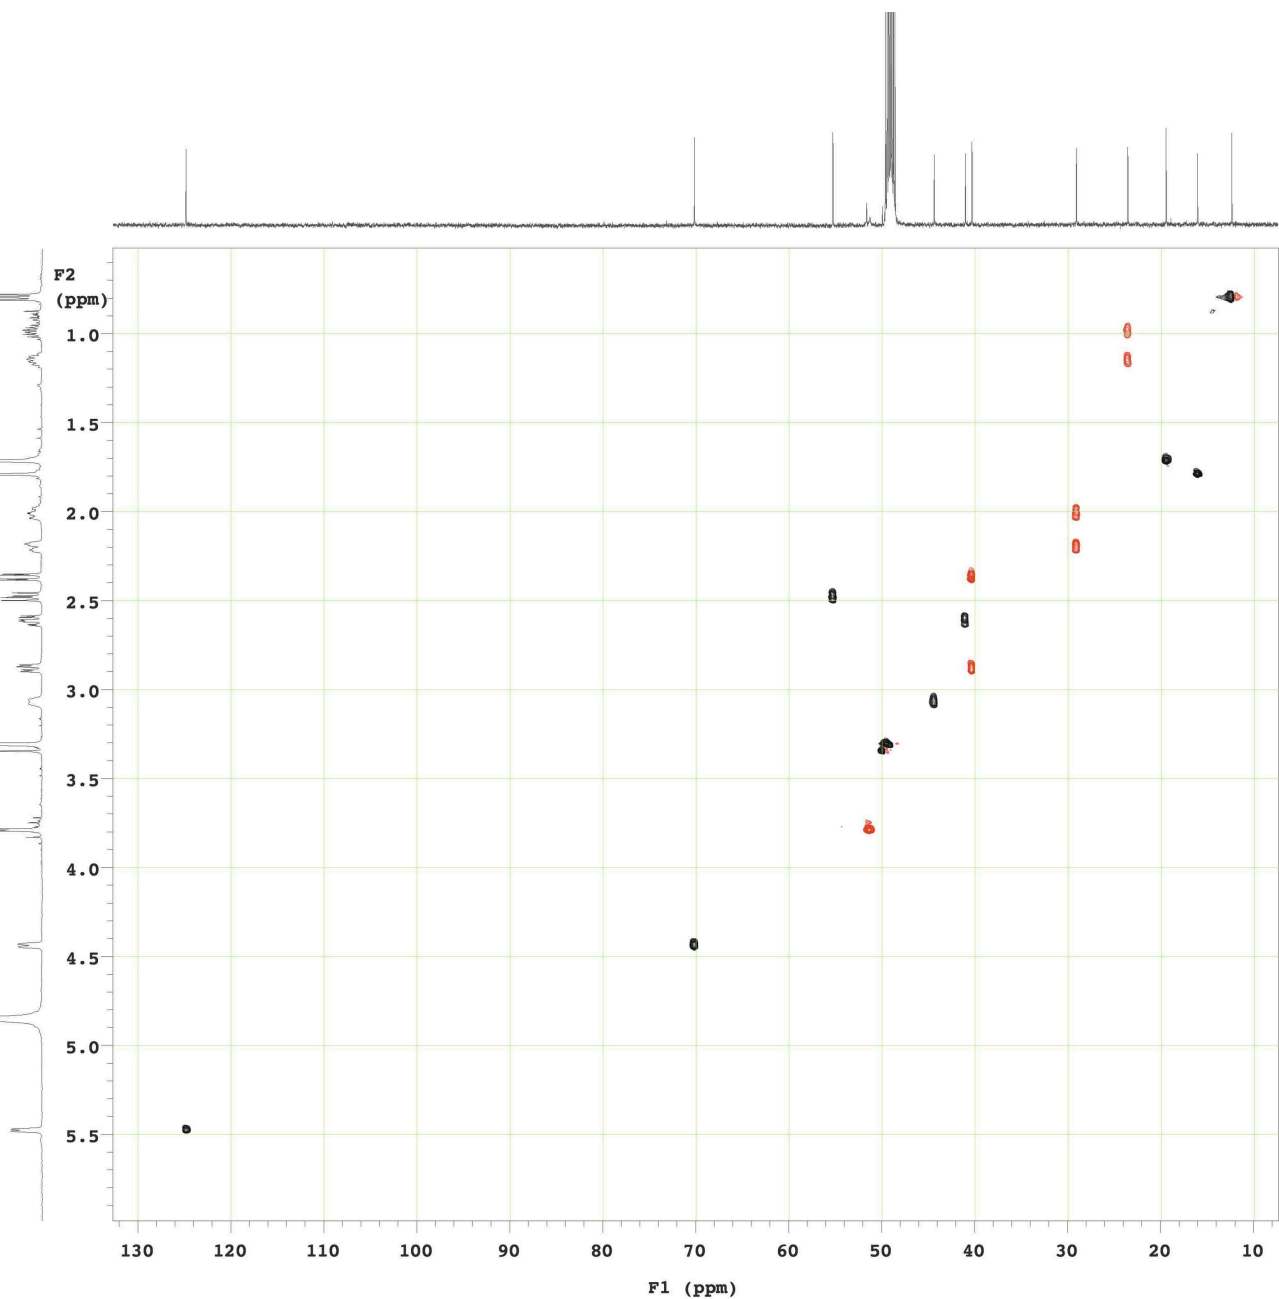

Figure S11. gHSQC spectrum of **1** in CD<sub>3</sub>OD (500 MHz)



PC1  
0908109C1H16H26-30  
exp36 gHMBC

| SAMPLE         |             | FLAGS         |          |
|----------------|-------------|---------------|----------|
| date           | Nov 26 2010 | hs            | n        |
| solvent        | CD3OD       | sspul         | n        |
| sample         | undefined   | PPGflg        | y        |
| ACQUISITION    |             | hsglv1        | 4414     |
| sw             | 3147.0      | SPECIAL       |          |
| at             | 0.163       | temp          | not used |
| np             | 1024        | gain          | 60       |
| fb             | 2000        | spin          | not used |
| ss             | 32          | GRADIENTS     |          |
| d1             | 1.500       | gzlv11        | 4414     |
| nt             | 128         | gt1           | 0.001000 |
| 2D ACQUISITION |             | gzlv13        | 2207     |
| sw1            | 28198.8     | gt3           | 0.001000 |
| ni             | 512         | gstab         | 0.000500 |
| phase          | 0           | F2 PROCESSING |          |
| TRANSMITTER    |             | sb            | 0.081    |
| tn             | H1          | sbs           | not used |
| sfrq           | 499.561     | fn            | 1024     |
| tof            | -980.6      | F1 PROCESSING |          |
| tpwr           | 53          | sb1           | 0.007    |
| pw             | 9.500       | sbs1          | not used |
| DECOUPLER      |             | fn1           | 2048     |
| dn             | C13         | DISPLAY       |          |
| dof            | 1945.5      | sp            | 261.6    |
| dm             | nnn         | wp            | 2618.4   |
| dmm            | ccc         | sp1           | 954.2    |
| dmf            | 11111       | wp1           | 27152.4  |
| dpwr           | 45          | rfl           | 58.1     |
| pwxlvl         | 61          | rflp          | 0        |
| pw             | 16.500      | rfl1          | 6225.3   |
| HMBC           |             | rflp1         | 6160.6   |
| jlxh           | 140.0       | PLOT          |          |
| jnxh           | 8.0         | wc            | 240.0    |
|                |             | sc            | 0        |
|                |             | wc2           | 200.0    |
|                |             | sc2           | 0        |
|                |             | vs            | 186      |
|                |             | th            | 1        |
|                |             | ai            | av       |

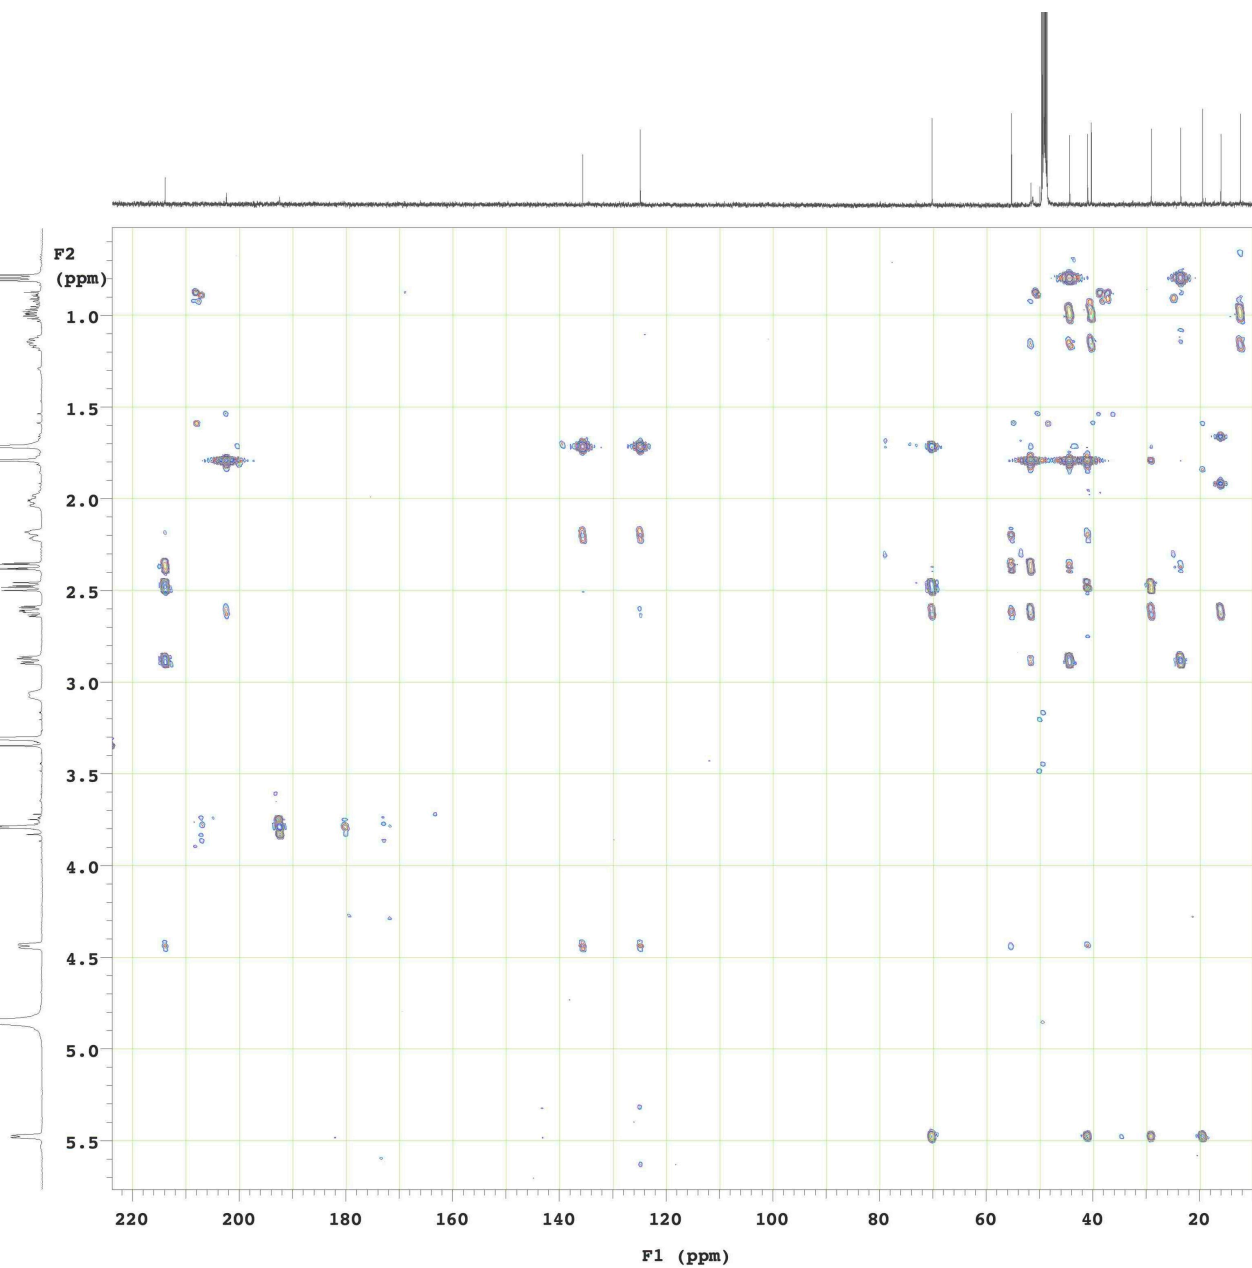

Figure S12. gHMBC spectrum of **1** in CD<sub>3</sub>OD (500 MHz)

PC1  
0908109C1H16H26-30

exp34 NOESY

| SAMPLE         |             | FLAGS         |          |
|----------------|-------------|---------------|----------|
| date           | Nov 26 2010 | hs            | n        |
| solvent        | CD3OD       | sspul         | y        |
| sample         | undefined   | PFGflg        | y        |
| ACQUISITION    |             | hsglvl        | 4414     |
| sw             | 3147.0      | SPECIAL       |          |
| at             | 0.163       | temp          | not used |
| np             | 1024        | gain          | 46       |
| fb             | 2000        | spin          | not used |
| ss             | 32          | F2 PROCESSING |          |
| d1             | 1.500       | gf            | 0.055    |
| nt             | 16          | gfs           | not used |
| 2D ACQUISITION |             | fn            | 2048     |
| sw1            | 3147.0      | F1 PROCESSING |          |
| ni             | 256         | gfl           | 0.045    |
| TRANSMITTER    |             | gfs1          | not used |
| tn             | H1          | procl         | lp       |
| sfrq           | 499.561     | fml           | 2048     |
| tof            | -1067.8     | DISPLAY       |          |
| tpwr           | 53          | sp            | 251.2    |
| pw             | 9.500       | wp            | 2639.9   |
| NOESY          |             | sp1           | 251.2    |
| mix            | 1.000       | wpl           | 2633.8   |
| PRESATURATION  |             | rfl           | 145.3    |
| satmode        | nnn         | rfp           | 0        |
| satpwr         | 0           | rfl1          | 145.3    |
| satdly         | 0           | rfpl          | 0        |
| satfrq         | 0           | PLOT          |          |
| DECOUPLER      |             | wc            | 200.0    |
| dn             | H1          | sc            | 0        |
| dm             | nnn         | wc2           | 200.0    |
|                |             | sc2           | 0        |
|                |             | vs            | 7192     |
|                |             | th            | 2        |
|                |             | ai            | ph       |

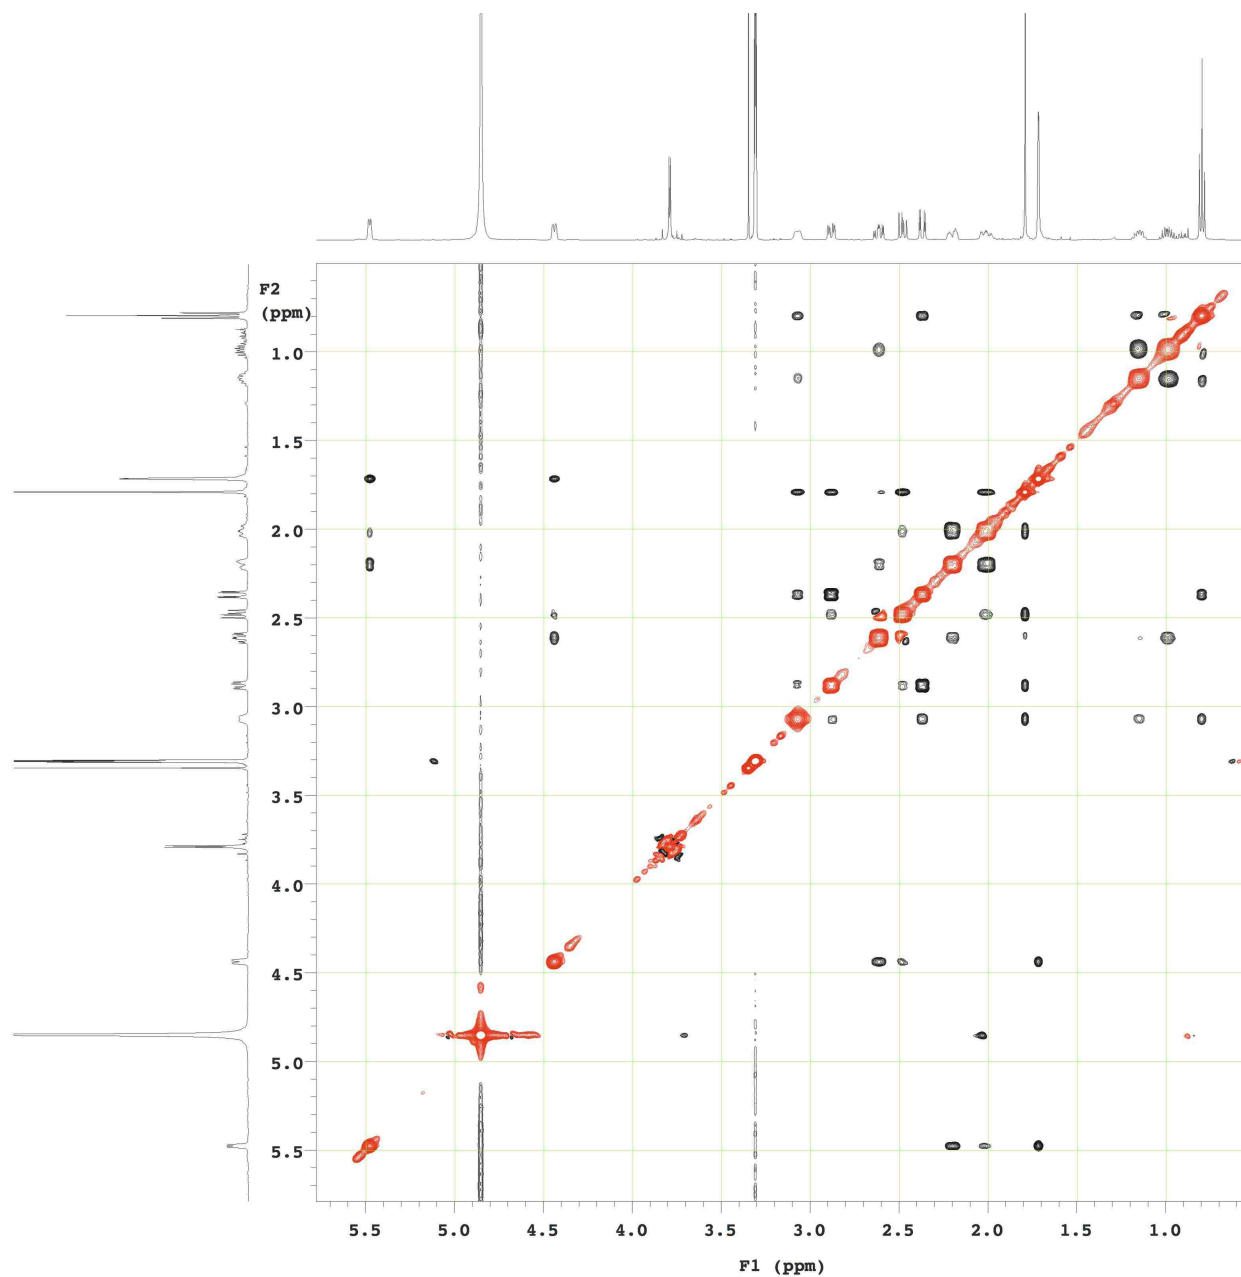

Figure S13. NOESY spectrum of **1** in CD<sub>3</sub>OD (500 MHz)
